# Growth Mode and Carbon Source Impact the Surfaceome Dynamics of *Lactobacillus rhamnosus* GG

Kirsi Savijoki<sup>1,2</sup>, Tuula A. Nyman<sup>3</sup>, Veera Kainulainen<sup>4</sup>, Ilkka Miettinen<sup>2</sup>, Pia Siljamäki<sup>1</sup>,  
Adyary Fallarero<sup>2</sup>, Jouko Sandholm<sup>5</sup>, Reetta Satokari<sup>4</sup>, Pekka Varmanen<sup>1\*</sup>

<sup>1</sup>*Department of Food and Nutrition, University of Helsinki, Finland*

<sup>2</sup>*Division of Pharmaceutical Biosciences, University of Helsinki, Finland*

<sup>3</sup>*Institute of Clinical Medicine, Department of Immunology, University of Oslo and  
Oslo University Hospital, Norway*

<sup>4</sup>*Faculty of Medicine, Human Microbiome Research Program, University of Helsinki,  
Finland*

<sup>5</sup>*Turku Bioscience, University of Turku and Åbo Akademi University, Finland*

**\*To whom correspondence should be addressed:** Pekka Varmanen, Department of Food and  
Nutrition, University of Helsinki, Finland. Tel. +358 2941 57057; Email:

pekka.varmanen@helsinki.fi

**Keywords:** *Lactobacillus rhamnosus*, probiotic, biofilm, surface protein, fructose, mucus,  
adhesion

## 1 **Abstract**

2 **Bacterial biofilms have clear implications in disease and in food applications involving**  
3 **probiotics. Here, we show that switching the carbohydrate source from glucose to fructose**  
4 **increased the biofilm formation and the total surface-antigenicity of a well-known**  
5 **probiotic, *Lactobacillus rhamnosus* GG. Surfaceomes (all cell surface-associated proteins)**  
6 **of GG cells grown with glucose and fructose in planktonic and biofilm cultures were**  
7 **identified and compared, which indicated carbohydrate source-dependent variations,**  
8 **especially during biofilm growth. The most distinctive differences under these conditions**  
9 **were detected with several surface adhesins (e.g., MBF, SpaC/A pilus and penicillin-**  
10 **binding proteins), enzymes (glycoside hydrolases, PrsA, PrtP, PrtR and HtrA) and**  
11 **moonlighting proteins (glycolytic, transcription/translation and stress-associated proteins,**  
12 **r-proteins, tRNA synthetases, Clp family proteins, PepC, PepN and PepA). The abundance**  
13 **of several known adhesins and novel moonlighters, including enzymes acting on casein-**  
14 **derived peptides (ClpP, PepC and PepN), increased in the biofilm cells grown on fructose,**  
15 **from which the surface-associated aminopeptidase activity mediated by PepC and PepN**  
16 **was further confirmed by an enzymatic assay. The classical surface adhesins were**  
17 **predicted to be more abundant on planktonic cells growing either on fructose (MBF and**  
18 **SpaA) or glucose (SpaC). An additional indirect ELISA indicated both growth mode- and**  
19 **carbohydrate-dependent differences in abundance of SpaC, whereas the overall adherence**  
20 **of GG assessed with porcine mucus indicated that the carbon source and the growth mode**  
21 **affected mucus adhesion. The adherence of GG cells to mucus was almost completely**  
22 **inhibited by anti-SpaC antibodies regardless of growth mode and/or carbohydrate source,**  
23 **indicating the key role of the SpaCBA pilus in adherence under the tested conditions.**  
24 **Altogether, our results suggest that carbon source and growth mode coordinate classical**  
25 **and nonclassical protein export in GG, which ensures the presence of an integral and**  
26 **coordinated system that contributes to resistance, nutrient acquisition and cell-cell**

1 **interactions under different conditions. In conclusion, the present study shows that**  
2 **different growth regimes and conditions can have a profound impact on the adherent and**  
3 **antigenic features of GG, thereby providing new information on how to gain additional**  
4 **benefits from this probiotic.**

5

## 6 **Introduction**

7 Probiotic bacteria, applied in various aspects of the food and pharmaceutical industries (1, 2),  
8 exploit sophisticated strategies to enable the utilization of many nutrients, maintain viability and  
9 adherence to mucosal surfaces, and modulate host immunity in a beneficial way during industrial  
10 processes and upon their consumption (3). Unlike free-living cells, the biofilm mode of growth  
11 has been shown to improve existing probiotic features (antimicrobial and anti-inflammatory  
12 functions) in some *Lactobacillus* strains (4-6). In addition, switching from the planktonic to the  
13 biofilm mode of growth can provide bacteria, including probiotics, with means to overcome  
14 lethal conditions, including antimicrobial treatments, host immune defenses, and changes in pH,  
15 salt, temperature and nutrients (7). Biofilms comprise cells enclosed in an extracellular matrix  
16 (consisting of nucleic acids, exopolysaccharides (EPS), lipids and/or proteins) and typically  
17 display adherent growth on either abiotic or natural surfaces (8). Probiotics must be consumed  
18 at least daily to obtain most of their benefits, and new probiotic supplements prepared as  
19 biofilms, e.g., in biocompatible microspheres or encapsulated in microcapsules, could offer  
20 longer lasting probiotic effects compared to those prepared from free-grown cells (9-11).

21 One of the most documented and utilized probiotic *Lactobacillus* strains, *L. rhamnosus* GG, is  
22 known to adhere to the human intestinal mucosa via pilus (encoded by *spaCBA*) extending from  
23 its cell surface and to persist for more than a week in the gastrointestinal tract (GIT) of healthy  
24 adults (12). EPS is another factor that plays an important role as a protective shield against host  
25 innate defense molecules to improve adaptation in the GIT (13). However, reduced EPS  
26 synthesis has been linked to the increased adherence and biofilm formation of GG, which by

1 uncovering specific adhesins necessary for biofilm formation, enabled the enhanced biofilm  
2 growth of this strain (14). The SpaCBA-pilus adhesin, which mediates the direct interaction with  
3 the host and abiotic surfaces, and MabA (the modulator of adhesion and biofilm), which  
4 strengthens the biofilm structure, are considered the central factors that mediate the biofilm  
5 formation of GG *in vitro* (15, 16). While the presence of biofilms in the colonic microbiome has  
6 been reported in several studies, GIT-associated probiotic biofilms have been found in specific  
7 niches of certain animal hosts (17, 18). GG can grow as a biofilm on inert substrates (15, 19, 20)  
8 and integrate well in a multispecies biofilm model with the potential to inhibit the growth of  
9 some cariogenic species (21). However, systematic studies aiming to uncover all surface-bound  
10 proteins on GG biofilms have not been conducted.

11 We previously demonstrated that the biofilm formation of GG in MRS medium under  
12 microaerophilic and anaerobic (5% CO<sub>2</sub>) conditions was protein-mediated (19), indicating that  
13 cell surface-associated proteins most likely affected the biofilm formation of this strain. In a  
14 multispecies biofilm model, GG was shown to reach high viable cell numbers with glucose or  
15 sucrose as the carbon source (22). Glucose and fructose can enhance the survival of GG in  
16 simulated gastric juice at pH 2.0 (23), while fructose also contributes to the *in vitro* adherence  
17 and antimicrobial activity of this probiotic (24, 25). These simple carbohydrates were recently  
18 found to prevent the colonization of a gut commensal bacterium, *Bacteroides thetaiotaomicron*,  
19 in the gut, an effect that was not observed with prebiotic fructo-oligosaccharides (26).

20 The present study aimed to uncover the effects of two simple carbohydrates, glucose and  
21 fructose, on the total surface-associated antigenicity of GG growing in planktonic and biofilm  
22 states. To explore these findings further, the surfaceome compositions from the same cells were  
23 compared, and some industrially relevant features were verified with phenotypic analyses. To  
24 the best of our knowledge, this is the first systematic study exploring surfaceomes of probiotic  
25 biofilms and demonstrating the importance of growth mode and carbon source in coordinating  
26 the adherent and industrial features of GG.

## 1 **Materials and Methods**

### 2 **Culture media**

3 *Lactobacillus rhamnosus* GG was routinely grown on commercial MRS agar (BD, Franklin  
4 Lakes, US) prior to propagation in modified MRS broth for planktonic or biofilm cultivations.  
5 The composition of this modified MRS was as follows: 10 g/L tryptone pancreatic digest of  
6 casein, 10 g/L beef extract powder, 5 g/L Bacto™ yeast extract, 1 g/L Tween 80, 2 g/L  
7 ammonium citrate tribasic, 5 g/L sodium acetate, 0.1 g/L magnesium sulfate heptahydrate, 0.05  
8 g/L manganese II sulfate monohydrate and 2 g/L dipotassium hydrogen phosphate trihydrate  
9 (pH 6.5-7). When appropriate, MRS was supplemented with 2% glucose (glc) (MRS-G) or 2%  
10 fructose (frc) (MRS-F) (Sigma-Aldrich, Espoo Finland) or less (1.75%, 1.5%, 1.25%, 1.0%,  
11 0.75%, 0.5%, 0.25%, 0.1, or 0.05%).

12

### 13 **Biofilm formation and quantification**

14 GG colonies from MRS agar plates were suspended in MRS supplemented with glc or frc at  
15 desired concentrations to obtain an  $OD_{600} = 0.15-0.2$ , from which 200  $\mu$ L was removed and  
16 added to flat-bottomed 96-well plates (FALCON; Tissue Culture Treated, polystyrene, Becton  
17 Dickinson), and the plates were incubated at 37 °C under anaerobic conditions (5% CO<sub>2</sub>) for 24  
18 h, 48 h or 72 h. Biofilm formation efficiency was assessed with crystal violet staining essentially  
19 as previously described (27). Briefly, the non-adherent cells were removed from the wells, and  
20 the biofilm cells were washed twice with deionized H<sub>2</sub>O. Adherent cells were stained with 200  
21  $\mu$ L of the crystal violet solution (0.1%, w/v) (Sigma–Aldrich, Munich, Germany) for 30 min at  
22 RT. Excess stain was removed by washing the cells twice with deionized H<sub>2</sub>O, and the stained  
23 cells were suspended in 200  $\mu$ L of 30% acetic acid by shaking at RT (400 r.p.m. for 30 min).  
24 The density of the biofilms was recorded at 540 nm using an ELISA reader (Labsystems  
25 Multiskan EX). Biofilm experiments were performed several times, using at least eight technical  
26 replicates.

## 1 **LIVE/DEAD staining of biofilms and confocal microscopy**

2 GG cells were suspended in MRS-G (2% glc) or MRS-F (2% frc) to obtain  $OD_{600} \sim 0.15-0.2$ ,  
3 from which 4 mL was added to uncoated 35 mm glass bottom dishes (MatTek, Ashland, MA,  
4 USA). Dishes were incubated at 37 °C under anaerobic conditions (5% CO<sub>2</sub>) for 48 hours for  
5 biofilm formation. Non-adherent cells were removed, and adherent cells were subjected to  
6 LIVE/DEAD viability staining using 5 μM of Syto9 and 30 μM of propidium iodide (PI)  
7 according to the manufacturer's instructions (LIVE/DEAD<sup>®</sup> BacLight™, Molecular Probes,  
8 Life Technologies). Fluorescence images were captured with Zeiss LSM510 META confocal  
9 microscope using Zeiss LSM 3.2 software (Zeiss GmbH, Oberkochen, Germany). All biofilms  
10 were analyzed in duplicates.

11

## 12 **1-DE immunoblotting**

13 Protein samples from planktonic and biofilm cell surfaces for 1-DE (SDS polyacrylamide gel  
14 electrophoresis) and immunoblotting were prepared as follows. GG cells were suspended in  
15 MRS-G or MRS-F to obtain an  $OD_{600} = 0.15-0.2$ . The cell suspensions were split in two; half  
16 (2.5 mL) of the suspension was cultured under planktonic conditions (Falcon tubes) and half (2.5  
17 mL/ tube) was cultured under biofilm-formation conditions (2.5 mL per well in a flat-bottomed  
18 24-well plate; FALCON - Tissue Culture Treated, Polystyrene, Becton Dickinson) at 37 °C in  
19 the presence of 5% CO<sub>2</sub>. The cell densities of planktonic cultures and biofilms, after suspending  
20 the adherent cells in fresh MRS, were measured at 600 nm. Surfaceome proteins from planktonic  
21 cells (1.5 mL) after overnight incubation were harvested by centrifugation (4000×g, 3 min, 4  
22 °C). Cells were washed once with ice cold 100 mM sodium acetate buffer (pH 4.7). Cells from  
23 biofilm cultures after 48 h of incubation were harvested by removing non-adherent cells and  
24 washing adherent cells with ice cold acetate buffer as above. Cells normalized to equal cell  
25 densities were centrifugated (4000×g, 3 min, 4 °C) and then suspended gently in two-fold  
26 concentrated Laemmli buffer (pH 7.0). Cells were incubated in Laemmli buffer on ice for 15

1 min and then an additional five minutes at RT. Supernatants containing the released surface-  
2 associated proteins were recovered by centrifugation (4000×g, 3 min, 4 °C). Equal volumes from  
3 each sample were subjected to 12% TGX™ Gel (BioRad) electrophoresis (1-DE) using 1x Tris-  
4 glycine-SDS as the running buffer. After 1-DE, proteins were transferred onto a PVDF  
5 membrane using the TransBlot Turbo™ Transfer System (BioRad) according to the  
6 manufacturer's instructions. The membrane was then probed first with antibodies (1:4000)  
7 detecting surface-associated factors of GG (28) and then with IRDye® 800CW goat anti-Rabbit  
8 IgG (LI-Cor® Biosciences) (1:20000). After probing, the membrane was blocked using Odyssey  
9 Blocking buffer and washed with PBS (phosphate buffered saline, pH 7.4) according to the  
10 instructions provided by LI-Cor® Biosciences. The cross-reacting antigens were detected and  
11 quantified using an Odyssey® infrared imaging system (LI-Cor® Biosciences) and the  
12 AlphaView Alpha View 3.1.1.0 software (ProteinSimple, San Jose, CA, USA), respectively. The  
13 experiment was repeated three times (each with two technical replicates).

14

### 15 **Mucus adhesion assay**

16 Adhesion to mucus was carried out as described previously (29, 30). GG was grown in MRS-G  
17 and MRS-F with H<sup>3</sup>-thymidine for metabolic labeling in planktonic and biofilm forms as  
18 described above in section 2.4 (1-DE immunoblotting). Briefly, the planktonic and biofilm cells  
19 were first washed with a low pH buffer (100 mM sodium acetate, pH 4.7), which prevented the  
20 release of adhesive moonlighting proteins (cytoplasmic proteins) from the cell surfaces. Then,  
21 the washed cells were allowed to bind the porcine mucin immobilized onto microtiter plate wells.  
22 After washing the cells to remove non-adherent cells, the radioactivity of the adherent cells was  
23 measured by liquid scintillation, and the percent of bacterial adhesion was determined by  
24 calculating the ratio between the radioactivity of the adherent bacteria and that of the added  
25 bacteria. The experiment was repeated twice with four to five technical replicates. An unequal  
26 variance t-test was used to determine significant differences between selected samples.

## 1 **Indirect ELISA for detecting changes in SpaC abundance**

2 Planktonic and biofilm GG cells were grown on MRS-G and MRS-F and washed with sodium  
3 acetate buffer as above. Washed cells at the same density were treated with 10  $\mu$ M 4,6'-  
4 diamidino-2-phenylindole (DAPI; Molecular Probes) to stain all bacterial populations and with  
5 antiserum raised against His<sub>6</sub>-SpaC to detect SpaC expression. Antiserum against purified His<sub>6</sub>-  
6 SpaC of *L. rhamnosus* GG was raised in rabbits using routine immunization procedures as  
7 described previously (31). The staining was carried out by using indirect immunofluorescence  
8 as described previously (32) with minor modifications. Briefly, GG cells were collected by  
9 centrifugation, washed once with 100 mM Na-acetate buffer (pH 4.7) and fixed with 4% (wt/vol)  
10 paraformaldehyde in phosphate buffered saline (PBS; pH 4.0) prior to detection with anti-His<sub>6</sub>-  
11 SpaC primary antibody and Alexa-488 (Invitrogen)-conjugated goat anti-rabbit IgG (1  $\mu$ g/ml)  
12 secondary antibody and DAPI counterstain. After staining, the optical density (OD<sub>600</sub>) of the  
13 cells was adjusted to 1.0 with washing buffer, and the intensity of the fluorescence in the samples  
14 was measured using the Victor3 1420 multilabel counter (PerkinElmer). The experiment was  
15 repeated twice, each with five technical replicates. An unequal variance t-test was used to  
16 determine significant differences between selected samples.

17

## 18 **Cell-surface shaving and LC-MS/MS analyses**

19 Surfaceome analyses were conducted with GG cells cultured in planktonic (24 h) and biofilm  
20 states (48 h) in MRS-G and MRS-F at 37 °C under microaerophilic conditions. Biofilms were  
21 formed using flat-bottomed 24-well plates with 2.5 mL of the indicated media containing  
22 suspended GG cells (OD<sub>600</sub> = 0.1) per well as described above. After 48 h of incubation, non-  
23 adherent cells were discarded, and the adherent cells were washed with ice-cold 100 mM Tris-  
24 HCL (pH 6.8). Pelleted cells suspended gently in 100  $\mu$ L of TEAB were mixed with 50 ng/ $\mu$ L of  
25 sequencing grade modified porcine trypsin (Promega), and digestions were incubated at 37 °C  
26 for 15 min. Released peptides and trypsin were recovered by filtration through a 0.2  $\mu$ m pore



1 size acetate membrane by centrifugation (7000×g, 2 min, +4 °C), and the digestions were further  
2 incubated for 16 h at 37 °C. Digestions were stopped by adding trifluoroacetate (TFA) to a final  
3 concentration of 0.6%. The peptide concentrations were measured using a Nano-Drop (ND 1000,  
4 Fisher Scientific) at 280 nm. For each growth mode, three biological replicate cultures were  
5 used.

6 Trypsin-digested peptides were purified using ZipTips (C18) (Millipore), and equal amounts of  
7 the peptide samples were subjected to LC-MS/MS using an Ultimate 3000 nano-LC (Dionex)  
8 and QSTAR Elite hybrid quadrupole TOF mass spectrometer (Applied Biosystems/MDS Sciex)  
9 with nano-ESI ionization as previously described (28). The MS/MS data were searched against  
10 the concatenated GG protein database composed of the target (Acc. No. FM179322; 2944  
11 entries) (12) and the decoy protein sequences using the Mascot (Matrix Science, version 2.4.0)  
12 search engine through the ProteinPilot software (version 4.0.8085). The Mascot search criteria  
13 were based on trypsin digestion with one allowed mis-cleavage, fixed modification of  
14 carbamidomethyl modification of cysteine, variable modification of oxidation of methionine, 50  
15 ppm peptide mass tolerance, 0.2 Da MS/MS fragment tolerance and 1+, 2+ and 3+ peptide  
16 charges. The false discovery rate (FDR) percentages calculated using the formula  $2n_{reverse}/$   
17  $(n_{reverse} + n_{forward})$  (33) indicated FDRs < 4% in each data set.

18 The raw Mascot proteomic identifications and associated files are freely downloadable from the  
19 the Dryad Digital Repository ().

20

## 21 **Protein identifications and surfaceome comparisons**

22 Mass spectra from each replica sample were searched both separately and combined against the  
23 indicated protein database. Proteins with Mascot score [ms]  $\geq 30$  and  $p < 0.05$  and identified in  
24 at least 2/3 replicates were considered high quality identifications and used to indicate condition-  
25 specific identifications and relative protein abundance changes. The emPAI (exponentially  
26 modified Protein Abundance Index) values of the high confidence identifications were used to

1 estimate protein abundance changes; emPAI is considered roughly proportional to the logarithm  
2 of the absolute protein concentration, which allows label-free and relative quantitation of the  
3 protein pairs (34). Principle component analysis (PCA) of the emPAI values was performed with  
4 IBM SPSS Statistics v.24. Missing values were substituted with half minimum emPAI value for  
5 each protein identified in at least 2/3 replicates in at least one of the conditions using MetImp  
6 1.2 (<https://metabolomics.cc.hawaii.edu/software/MetImp/>) (35, 36) (**Table S1**). Two proteins  
7 with zero variance (YP\_003172193.1; YP\_003172584.1) were excluded. PCA of the imputed  
8 emPAI data was carried out utilizing Varimax rotation with Kaiser normalization.

9

### 10 **Analysis of surface-associated aminopeptidase activities**

11 Cell surface-associated aminopeptidase activity (PepN and PepC) was determined from  
12 planktonic and biofilm cells cultured in the presence of 2.0% and 0.5% glc and frc for 24 h  
13 (planktonic and biofilm cells) and 48 h (biofilm cells) using a previously reported method (37)  
14 with the following modifications. Briefly, biofilm and planktonic cells (1.8 mL) obtained from  
15 10 mL cultures were washed as described above and then suspended in 1 mL of cold 100 mM  
16 Tris-HCl buffer, pH 6.8. The optical density of each sample was measured at 540 nm. The  
17 incubation mixture contained 1 mM L-leucine-*para*-nitroanilide (Leu-*p*NA) substrate in 200  $\mu$ l  
18 of the cell suspension. The inhibitory effect of the metal-ion chelator EDTA was examined by  
19 incubating the cell suspension with 5 mM EDTA for a few minutes prior to the addition of Leu-  
20 *p*NA. Reactions were incubated at 37 °C for 5 min – 25 min and stopped with 800  $\mu$ l of 30%  
21 (v/v) acetic acid. After centrifugation (8000 $\times$ g, 5 min), the absorbance was measured at 410 nm.  
22 The specific aminopeptidase activity was calculated by dividing the absorbance change at 410  
23 nm by the reaction time used for Leu-*p*NA hydrolysis and the optical density of the cells (OD<sub>540</sub>).  
24 An unequal variance t-test was used to determine significant differences between selected  
25 samples.

26

## 1 **Results**

### 2 **Biofilm formation of GG on fructose and glucose**

3 Biofilm formation of GG was first tested at three time points (24, 48 and 72 hours after  
4 inoculation, hpi) in MRS-G and MRS-F (2% glc and 2% frc) and MRS without carbohydrate,  
5 which indicated that frc stimulated biofilm formation by approximately 2-fold compared to glc  
6 at each time point tested (**Figure 1A**). The most efficient biofilm growth with frc and glc was  
7 detected at 48 and 72 hpi, respectively. The cell viability analysis of biofilm cells grown on  
8 glass-bottom dishes with both carbon sources revealed that biofilms formed on frc at 48 hpi  
9 contained proportionally more living cells than those grown on glc (**Figure 1B**). In addition, the  
10 biofilm formation efficiency was higher on hydrophilic polystyrene than hydrophilic glass under  
11 the conditions used (data not shown).

12

### 13 **Growth mode- and carbon source-induced changes in cell-surface antigenicity**

14 The surface antigenicity of GG cells grown in biofilm and planktonic states in MRS-G and MRS-  
15 F was studied by subjecting surface-associated proteins extracted in 1x Laemmli buffer to 1-DE  
16 combined with immunoblotting using antisera raised against intact GG cells. **Figure 1C** reveals  
17 that in each sample, the most intense/abundant cross-reacting antigen signals migrated to  
18 approximately 65, 55, 40 and 35 kDa. Comparing the total antigen intensity profiles, reflecting  
19 antigen abundances (**Figure 1C, lower panel**), showed that the presence of frc in the growth  
20 medium increased the surface antigenicity by ~two-fold in planktonic and ~ 2.5-fold in biofilm  
21 cells compared to cells grown on glc. In glc-associated cells, switching from planktonic to  
22 biofilm growth had no effect on surface-antigenicity, whereas the surface-antigenicity increased  
23 by ~20% after switching from planktonic to biofilm growth in the presence of frc. The presence  
24 of Frc in the growth medium resulted in the appearance of unique protein bands at 15 and 20  
25 kDa in both the planktonic and biofilm cell samples, while a higher-molecular weight protein  
26 (~130 kDa) was specific to glc- and frc-biofilm samples. Thus, growing cells in planktonic or

1 biofilm forms on frc increases the overall surface-antigenicity of GG along with the specific  
2 production of small-molecular-weight antigens, while a larger protein was specifically produced  
3 by biofilm cells growing on both carbon sources.

4

## 5 **Identifying the surfaceomes of GG cultured under different conditions**

6 We previously demonstrated that the biofilm formation of GG is mainly protein-mediated (19).  
7 To explore this further, the biofilm-associated surfaceomes were identified by LC-MS/MS and  
8 identified proteins ( $p < 0.05$ ) are listed in **Table S2**. Four surfaceome catalogs ( $[ms] \geq 30$ ,  $p <$   
9  $0.05$ ) were generated with each data set showing extensive overlap; 70% - 94% of the identified  
10 proteins were shared between at least two of the replica samples (**Table S3**). The total number  
11 of high-quality identifications was 74, 106, 175 and 218 proteins from the glc-planktonic, frc-  
12 planktonic, glc-biofilm and frc-biofilm cells, respectively (**Table S4**). As no decrease in the  
13 colony forming units (CFUs) of the shaved cells was observed (data not shown), we concluded  
14 that no significant cell lysis had occurred under the trypsin-shaving conditions used. Thus,  
15 comparison of the surfaceome catalogs indicated that the number of proteins at the cell surface  
16 of GG increased with frc as the carbon source compared to glc. Similarly, growth in the biofilm  
17 state increased the number of protein identifications compared to cells grown in planktonic form,  
18 regardless of the carbon source used.

19

## 20 **Multivariate analysis for screening specific surfaceome patterns**

21 A principal component analysis (PCA) was performed to identify carbon source- and growth  
22 mode-dependent patterns in the surfaceome data. **Figure 2A** shows that all biological replicate  
23 samples clustered together well, with four clearly separated and identifiable groups. PC1,  
24 correlating with the change in growth mode-, and PC2 with the carbohydrate-dependent changes,  
25 suggest that the carbon source had a greater effect on GG during biofilm growth than planktonic  
26 growth. This was further explored by Venn diagrams that compared the number of specifically

1 identified proteins (unique to growth mode and/or carbon source) and proteins with emPAI  
2 values showing  $\geq 2$ -fold change (**Table S4**). Venn digrams in **Figure 2B** compares the growth-  
3 mode and carbon source-associated surfaceomes. The number of specifically identified proteins  
4 (not identified from planktonic cells) was 106 and 115 in biofilm cells grown on glc and frc,  
5 respectively. In total, 6 and 3 identifications were specific for planktonic cells grown on glc and  
6 frc, respectively. In addition, the abundance of 37 and 58 proteins increased ( $\geq 2$ -fold) in biofilm  
7 cells, whereas 1 and 3 proteins were more abundant ( $\geq 2$ -fold) in planktonic cells with glc and  
8 frc, respectively. With frc as the carbon source, the number of specific identifications (not  
9 identified from glc-grown cells) from the planktonic and biofilm cells was 39 and 56,  
10 respectively. For glc, 7 and 13 specific identifications were made from the planktonic and  
11 biofilm cells, respectively. Two and 12 proteins displayed  $\geq 2$ -times higher abundances in  
12 planktonic cells grown of glc and frc, respectively. The number of more abundant proteins with  
13  $\geq 2$ -fold change was 13 and 64 on glc- and frc-associated biofilms. Altogether, the presence of  
14 frc in the growth medium resulted in a higher number of specifically identified proteins as well  
15 as proteins with increased abundances in comparison to cells grown on glc.

16 Because Venn diagrams implied that the carbon source affected the number and amount of  
17 proteins attached to the biofilm surfaces, we also explored the biofilm formation efficiency in  
18 the presence of varying carbohydrate concentrations. **Figure 2C** shows that frc enhanced the  
19 biofilm formation over a wider concentration rate compared to glc. However, 0.5% glc produced  
20 the thickest biofilms at 48 hpi, while over two-fold higher concentrations of frc were required to  
21 achieve the thickest biofilms under the same conditions. Furthermore, optical densities (at 600  
22 nm) of the formed biofilms grown on different carbohydrate concentrations revealed only  
23 marginal changes in cell densities, indicating that increased biofilm formation was not  
24 accompanied by an increased number of cells (data not shown).

25

26

## 1 **Identifying specific changes in protein abundance**

2 The identification data were next compared to screen for individual growth mode- and carbon  
3 source-induced changes in the cell surface. The most distinctive protein abundance variations,  
4 including condition-specific identifications and proteins with abundance change  $\geq 2$ -fold  
5 between the indicated conditions are listed in **Table S5**. The abundance changes are visually  
6 illustrated by heatmaps; **Figure 3** shows relative abundance changes estimated for classical  
7 surface proteins and known/adhesive moonlighters and **Figure 4** new or novel moonlighting  
8 proteins. Altogether, these proteins could be categorized into three groups: **(i)** the classically  
9 secreted surface adhesins, transporters and enzymes, **(ii)** known surface-associated moonlighters  
10 with adherence features, and **(iii)** new or novel moonlighters lacking established extracellular  
11 function. The known and predicted moonlighters were the dominant protein group among the  
12 detected surfaceomes. Among the identified moonlighters, the ribosomal proteins r-proteins (42  
13 proteins), PTS/ABC-type transporter proteins (17 proteins; several OppA paralogs) and amino  
14 acid tRNA synthetases (10 proteins) formed the largest protein groups.

15  
16 ***Proteins specific to one of the tested conditions.*** The greatest proportion (35 proteins) of the  
17 one-condition identifications was detected from the frc-biofilm cells. These included known and  
18 predicted moonlighters (e.g., RbfA, PDHA, GreA, GPD, FrlB, IF-2 and AlaS), Clp family  
19 chaperones (ClpL, ClpA and ClpC) and a PepN aminopeptidase, which were all proposed to be  
20 present at reasonably high abundances. Seven small molecular weight (6-33 kDa) moonlighters  
21 (YP\_003170092.1, YP\_003170859.1, YP\_003170536.1, YP\_003171217.1, YP\_003171101.1,  
22 YP\_003172119.1 and YP\_003170467.1) were also found to be specific to frc-biofilm surfaces.  
23 The classical surface proteins, such as a 70-kDa penicillin-binding protein (PbB3) and a 28-kDa  
24 Aes lipase, were specific to frc-biofilm surfaces and, based on the emPAI values were predicted  
25 to be produced at low levels under these conditions. Leucyl-tRNA synthetase (LeuS) and  
26 glutamine transport (GlnQ) were specifically identified from glc-biofilm surfaces. Protein

1 identifications specific to planktonic cells growing on glc included the shaft pilin subunit SpaA,  
2 encoded by the *spaCBA* pilin operon (12).

3  
4 ***Growth mode-specific identifications.*** In total, 3 and 47 proteins were detected as specific to  
5 planktonic and biofilm cell growth, respectively, independent of the carbon source. Planktonic-  
6 specific identifications included the classically secreted 97-kDa SpaC pilin subunit (encoded by  
7 the *spaCBA* operon), a 73-kDa lectin-binding protein and the moonlighting Clp family ATPase  
8 ClpB. Classical surface-proteins specific to biofilm cells included one of the OppA transporter  
9 paralogs (YP\_003171102.1) components of the F-ATPase (F1Fo ATPase) membrane bound  
10 complex, AtpA conferring catalytic and beta AtpD regulatory functions. AtpA was specific to  
11 biofilm cells growing on glc and frc. AltD was more abundant than AtpA on biofilm cells, while  
12 the beta subunit was also detected in planktonic cells grown on frc. Several known and predicted  
13 moonlighters were also specifically identified from biofilm cell surfaces. These included seven  
14 amino acid tRNA synthetases (Thr, Met, Asn, Ser, Glu, Lys and Asp); 11 known (D-LDH,  
15 PPGM, 6-PGD, UspA, IF-1, 6-PFK, RpoB/C, GlnA, PepA, and EngD); and 13 predicted  
16 moonlighters (RpsF, RplP, RpsQ, RpmE2, RplT, RpmG, RplM, RpsC, RplF, RplR, RmlA,  
17 RmlC and RmlD). Among the predicted moonlighters, RmlA, RmlC and RmlD are encoded by  
18 the four-gene (*rmlABCD*) operon involved in dTDP-rhamnose biosynthesis.

19  
20 ***Carbon source-specific identifications.*** From the two carbon sources, frc was found to induce  
21 specific surfaceome changes similar in both the planktonic and biofilm cell surfaces, whereas  
22 only one glc-specific identification (prolyl-tRNA synthetase -ProS) was shared by the planktonic  
23 and biofilm cells. The frc-specific identifications included classical surface proteins, such as the  
24 lactocepin (PrtP), an extramembranal protein (DltD), a tellurite resistance protein (TelA), five  
25 ABC/PTS-type transporters mediating type I protein secretion (MFP/HlyD), amino acid  
26 (OppA)/metal ion intake/output proteins (YP\_003172665.1, YP\_003169947.1,

1 YP\_003169947.1, YP\_003170942.1, YP\_003172169.1, YP\_003170075.1 and YP\_003171105.)  
2 and two penicillin-binding proteins (PbP2 and PbP2X-like/FtsI). In addition, two  
3 phosphoglycerol transferase (MdoB) paralogs of different sizes (78 and 84 kDa) and an r-protein,  
4 RplX, were detected as moonlighting proteins specific to frc-associated cells. From these, the  
5 greatest differences were associated with RplX, the ABC transporters for metal ion binding  
6 (YP\_003172169.1) and oligopeptide uptake (OppA, YP\_003169947.1), the 78-kDa MdoB  
7 paralog and the penicillin-binding proteins PbP2X-like and PbP2, which all displayed over two-  
8 fold higher abundances during biofilm growth compared to planktonic growth on frc.

9  
10 ***Growth mode-specific changes.*** Planktonic- or biofilm growth-induced surfaceome changes  
11 independent of the carbon source used were considered growth mode-induced changes. Twenty-  
12 nine proteins with similar abundance levels in both the glc- and frc-biofilm cells and higher  
13 abundances in comparison to their planktonic counterpart cells included several known and  
14 predicted moonlighters. Among these, the greatest differences in abundance were detected for  
15 predicted moonlighters, such as an elongation factor – EfG (>8.0-fold increase), an 8-kDa  
16 hypothetical protein – YP\_003172198.1 (with ~6.0-fold increase), an aminopeptidase – PepC  
17 (with ~5.0-fold increase) and a ClpP caseinolytic peptidase (>2.0-fold increase). Known  
18 moonlighters (PGK, TPI, L-LDH, GaPDH and RpoA) and 21 r-proteins (RplR, RplO, RpsG,  
19 RplJ, RplU, RplQ, RpsD, RpsE, RpsR, RpsD, RpsE, RpsB, RpsS, RpsA, RpsM, RpsH, RplK,  
20 RpsL, RplN, RplK and RplB) were less abundant but still over 2-fold more abundant on biofilm  
21 than on planktonic cell surfaces. Only one of the OppA paralogs (YP\_003171102.1) was found  
22 to be ~5-times more abundant on planktonic cells on both carbon sources.

23  
24 ***Carbon source-induced changes in biofilm cultures.*** In total, 61 proteins more abundant in glc  
25 and frc biofilms than in planktonic cells were divided into four groups as follows: (i) Proteins  
26 “more induced” on glc than on frc, i.e., proteins exhibiting greater relative abundance difference



1 between planktonic and biofilm growth modes when grown on glc. This group included twenty-  
2 two proteins and 14 proteins with > 5-fold higher differences in abundance and included the  
3 classically secreted penicillin-binding protein (PbP1B) as well as several known and predicted  
4 moonlighters (DnaK, L-LDH, PYK, PGM, GBI, RplA, RplD, RpsE, RpsB, RplQ, RpsG, and the  
5 8-kDa YP\_003172198.1). (ii) Proteins more abundant on glc-biofilm than on frc-biofilm cell  
6 surfaces included dihydrolipoamide acetyltransferase (~4.7-fold increase), a potential  
7 Com\_YlbF family protein predicted to ensure proper biofilm formation (~2.7-fold increase) and  
8 five r-proteins (RplK, RplB, RplN, RpsF and RpmF) with fold-changes ranging from 2.4 – 4.6.  
9 (iii) Proteins “more induced” on frc than on glc. The majority of these were identified as known  
10 and predicted moonlighters (EfTS, GroEL, AtpD, FBA, RplV, RpsR and CspC), with fold-  
11 change 4 -15 and with EfTS (~15-fold increase) and GroEL (~9-fold) displaying the greatest  
12 changes in abundance. The classical surface-proteins, including the PrtP protease (specific to  
13 frc-cells) and the lipoprotein CamS (~4-fold increase), were predicted to be more abundant on  
14 frc cells than on glc cells. (iv) Proteins more abundantly produced on frc- than on glc-associated  
15 biofilm cell surfaces included five classical surface proteins, which included one of the OppA  
16 paralogs (YP\_003171812.1), the PrsA chaperone/foldase, the serine-proteases PrtP and HtrA  
17 and the CamS lipoprotein. Of these, OppA (>15-fold increase), PrsA (~7-fold increase) and PrtP  
18 (~4-fold increase) displayed the greatest changes in abundance. In total, 9 known and predicted  
19 moonlighters were also more abundantly produced ( $\geq$  4-fold) on frc-biofilm cell surfaces,  
20 including an 18 kDa small heat shock protein (sHSP), a cold-shock protein (CspC), two amino  
21 acid tRNA synthetases (LysS and AspS), RpsR, phosphoglucomutase (PPG), and a dTDP-  
22 glucose-4,6-dehydratase (RmlB, encoded by the *rmlABCD* operon). In addition, a dTDP-4-  
23 dehydrorhamnose reductase – RmlD, with a >2.0-fold change in abundance, was also identified  
24 from the frc-biofilm cells.

25 ***Carbon source-induced changes in planktonic cultures.*** Carbon source-dependent changes in  
26 planktonic cell surfaces could be divided into two groups. (i) Proteins predicted to be more

1 abundant on cells growing on frc included the extracellular matrix-binding protein  
2 (YP\_003171611.1) with >8-fold higher abundance. Another classical surface protein, PrsA, and  
3 two moonlighters (PtsI and RplC) were also predicted to be ~5-fold more abundantly produced  
4 on frc cells. (ii) Proteins predicted to be more abundantly produced in the presence of glc  
5 included one of the OppA paralogs (YP\_003171812.1), an MltA lytic hydrolase, a prolyl-tRNA  
6 synthetase – ProS, and the AtpD protein.

7

### 8 **Adherence of biofilm and planktonic cells to porcine mucus**

9 Because the identification data implied that the growth mode and carbon source in the growth  
10 medium could affect the adherence features of GG, we investigated the mucus-binding ability  
11 of the planktonic and biofilm cells grown on glc and frc. **Figure 5A** indicates that the biofilm  
12 cells grown on frc displayed the highest level of adherence, while planktonic cells grown on glc  
13 were the least adherent. The frc biofilms demonstrated a mucus-binding ability that was ~2-fold  
14 more efficient than that of the glc-associated planktonic cells;  $p = 0.037$ ). The possible role of  
15 the SpaC-adhesin, the tip pilin of the SpaCBA pilus known to mediate key interactions with the  
16 human mucus (12), in mediating the frc-stimulated adherence was assessed next by testing the  
17 adherence of the GG cells in the presence of anti-SpaC antiserum. **Figure 5A** indicates that the  
18 presence of SpaC antibodies markedly decreased the adherence of each type of cell to mucus.  
19 Although the final level of adherence detected for these cells was somewhat similar, the biofilm  
20 cells grown on frc displayed the greatest SpaC-mediated inhibition, whereas the level of  
21 adherence decreased the least in glc-associated planktonic cells. To readdress the possible role  
22 of the pilus structure in the observed differences, we also monitored the SpaC abundances on  
23 each GG cell type. As shown in **Figure 5B**, the highest abundance of SpaC was detected on the  
24 glc-associated biofilm cells, which was >2-fold ( $p = 4.46e-09$ ) higher than that on the planktonic  
25 cells grown on glc and ~2-fold ( $p = 1.15e-07$ ) higher than that on the frc-biofilm cells. Planktonic  
26 cells grown on frc displayed the lowest SpaC abundance.

## 1 **Whole-cell aminopeptidase activity**

2 Varying abundances detected for predicted cell-surface moonlighters, such as PepN, PepC, PepA,  
3 ClpP, and several OppA paralogs, implied differences in the ability of the GG cells to utilize  
4 casein/casein-derived peptides for growth. PepN was specific to frc-biofilm cells. PepC was  
5 predicted to be equally abundant on the biofilm cells grown on frc and glc and displayed over a  
6 4-fold higher abundance on biofilm than planktonic cells. Comparison of PepN and PepC implies  
7 that PepC is produced ~2-fold more on the frc-biofilm cells than PepN on the same cells. To  
8 verify these results, we monitored the surface-associated aminopeptidase activity by exposing  
9 washed and intact GG cells to a chromogenic substrate, Leu-*p*NA, a specific substrate for both  
10 aminopeptidases (37). **Figure 5C** confirms the identification findings by showing that the  
11 surface-associated aminopeptidase activity of frc-biofilm cells was ~4-fold higher ( $p = 0.001$ )  
12 than that of planktonic cells growing on frc. Changes from glc to frc increased the  
13 aminopeptidase activity on both the planktonic and biofilm cell surfaces but led to a  
14 proportionally greater increase in the biofilm cell surface. Lowering the carbohydrate  
15 concentration to 0.5% increased the aminopeptidase activity in planktonic cells by ~4-fold, while  
16 only a slight decrease in the enzyme activity was observed in biofilm cells on both carbon  
17 sources. Enzyme activities were also examined in the presence of 5 mM EDTA, a metal-chelator  
18 that inhibits the activity of metallopeptidases such as PepN while not affecting other types of  
19 peptidases such as PepC (37). Since EDTA inhibited only marginally the total aminopeptidase  
20 activity only in frc-biofilm cells, PepC is the likely candidate for the hydrolysis of the substrate.

21

## 22 **Discussion**

### 23 **Carbon source controls the protein-dependent biofilm growth of GG**

24 Environmental signals, such as O<sub>2</sub>, CO<sub>2</sub>, bile, mucins, nondigestible polysaccharides and  
25 carbohydrates present in the human GIT, have been shown to affect the GG biofilm formation  
26 *in vitro* (15, 19). In MRS growth medium, GG produces biofilm, which is completely

1 disintegrated by treatment with proteolytic enzyme (19), indicating the presence of a large  
2 amount of proteins in the biofilm matrix and/or that biofilm formation is protein-mediated. Since  
3 both carbon metabolism (15) and cell-surface exposed proteins (19) appear to play a role in  
4 biofilm formation, we explored this link further by investigating the effects of glc and frc as  
5 carbon sources on the surfaceome composition of GG. Our findings indicated that changing the  
6 carbon source from glc to frc resulted in enhanced biofilm formation efficiency of GG *in vitro*.  
7 GG is known to exert high *in vitro* adhesion to Intestinal Epithelial Cells (IECs) and biofilm  
8 formation capacity on polystyrene and glass (15, 38). Here, our findings demonstrated more  
9 efficient biofilm growth on polystyrene than on glass and more efficient biofilm growth with frc  
10 than with glc on both inert materials. Crystal violet provides a good detection of biofilm mass,  
11 but this dye stains both the bacterial cells and extracellular matrix, including proteins (39, 40).  
12 As the tested carbohydrates had only a marginal effect on the cell density, we suggest that the  
13 increase in crystal violet staining, instead of showing increased biofilm formation, related  
14 directly to changes in the protein abundance of biofilm cells. A similar observation was also  
15 made when growing the biofilm cells with varying carbohydrate concentrations; decreased  
16 carbohydrate concentrations resulted in thicker biofilms, which did not result from higher cell  
17 density (data not shown). Thus, changes in carbon sources and their concentrations regulate the  
18 changes in protein abundance on the biofilm cell surfaces.

19

## 20 **Biofilm growth and frc in growth medium enhance the protein export in GG**

21 Examining the cause-effect relationships between the identified surfaceomes revealed that the  
22 carbon source played a more important role in the biofilm mode of growth. Conditions of glc  
23 limitation have been shown to enhance the biofilm formation of GG (16). Here, decreasing the  
24 concentration of both carbon sources in growth medium resulted in similar outcomes. The  
25 presence of frc enhanced biofilm formation over wider concentrations than glc. Known and novel  
26 moonlighting proteins were the dominant protein group in the biofilm-associated surfaceomes.

1 Comparing the *frc*- and *glc*-associated surfaceomes implied that the export of these nonclassical  
2 surface proteins is more efficient in both the biofilm and planktonic cells growing on *frc*. The  
3 presence of moonlighting proteins on the cell surface or in the culture medium has been reported  
4 for several microbial species, and for many of these, the moonlighting activity outside of the  
5 cells has been demonstrated (41, 42). It has been proposed that bacteria recycle conserved  
6 cytoplasmic proteins in a pH-dependent manner in the matrix to facilitate interspecies  
7 interactions without specifically recognizing the dedicated matrix components of the other  
8 species (43). In a recent study, the strongly positively charged r-proteins were shown to be  
9 embedded in *S. aureus* biofilm matrix under acidic conditions [44]. This was proposed to depend  
10 on the pH, coordinated by the formation/release of acidic fermentation end-products in the  
11 biofilm cells facing oxygen limitation [44]. In the present study, the pHs of the spent culture  
12 supernatants were clearly acidic, pH < 5.0 (data not shown). Thus, while r-proteins were  
13 identified as the most abundant moonlighters in the biofilm matrices, we suggest that low pH  
14 could have promoted the interactions between the r-proteins and the biofilm cells also in the  
15 present study. Although mechanisms that signals cytoplasmic proteins out from the cells are not  
16 known, a WXG motif present in some moonlighters or the SecA2-dependent secretion system  
17 are considered potential signals/mechanisms driving the export of nonclassical moonlighters.

18 In general, the mechanisms underlying their export/transport remain unknown (45). In view of  
19 this, it is tempting to speculate that the specific appearance of HlyD/MFP in *frc*-associated cell  
20 surfaces indicates the role of this protein in directing moonlighting proteins out of the cell. HlyD  
21 is part of a translocon that comprises HlyB, HlyD and TolC, which is proposed to coordinate the  
22 transport of potential novel proteins by quite different mechanisms (46). Overexpression of  
23 PrsA, a known surface-associated chaperone or foldase acting on secreted proteins (47), on  
24 biofilm cells and *frc*-associated cells is another plausible factor contributing to protein secretion  
25 under these conditions. This chaperone/foldase is known to enhance protein secretion efficiency  
26 in bacteria (48) and act on various substrates, ranging from 20 to 80 kDa in size (49). The serine-

1 type surface-protease, HtrA, follows the same abundance trend as PrsA and is another classical  
2 surface-protein that could enhance protein secretion in *frc*-associated samples. In bacteria, HtrA  
3 is involved in degrading abnormal proteins, processing secreted proproteins and the maturation  
4 of native proteins (50), but this protease can also affect biofilm formation and control the  
5 presence of surface-associated moonlighters, such as enolase (ENO) and glyceraldehyde-3-  
6 phosphate dehydrogenase (GapDH) (51).

7 Here, ENO, EfTU, TDPA, PGK and GroEL, each with previously reported adhesive functions  
8 (41, 42), were detected as the most abundant moonlighters in the biofilm cells growing on both  
9 carbon sources. In addition, stress response proteins (GroES and DnaK), glycolytic proteins  
10 (PGM, PYK, PGK, FBA, GPI, L/D-LDH, GMR and PDCE2), the elongation factors EfTS and  
11 EfG, the RNA polymerase subunit RpoA, the translation initiation factor IF1, and the trigger  
12 factor TF, were also detected as relatively abundant on biofilms. The r-protein moonlighters (a  
13 total of 43 proteins) were the largest protein group among the biofilm-associated surfaceomes,  
14 independent of the carbon source used. In addition to their proposed role as biofilm  
15 integrity/stability enhancing role, coordinated by the production of acidic fermentation end-  
16 products (44), some of the identified r-proteins may also have other moonlighting functions. The  
17 most abundant r-proteins were RplX, RpsE, RpsG, RplL and RplO, from which RplL (the 50S  
18 ribosomal protein L7/L12) was predicted to be the most abundant. The high abundance of this  
19 r-protein during biofilm growth could explain the concomitant presence of another moonlighting  
20 protein, EfG, on the biofilm cells at high abundances, as the GTPase activity of EfG is reported  
21 to require RplL for ribosomal translocation (52). For several r-proteins (e.g., L5, L11, L23, L13a,  
22 S3, S19, S27), noncanonical functions ranging from gene expression regulation to subverting  
23 pro-inflammatory actions, apoptosis and protection against abiotic stress (41, 53, 54) have been  
24 proposed. The increased abundance of the trigger factor (TF) during the biofilm mode of growth  
25 could be explained by the concomitant presence of the ribosomal protein L23. This r-protein has  
26 been reported to have binding sites for both the TF and the signal recognition particle, which is

1 thought to aid in protein export to the cell membrane (55). The specific appearance of several  
2 moonlighting aminoacyl-tRNA synthetases (ATRSs) in biofilm cells was also interesting, as  
3 these enzymes, unrelated to their primary function, also regulated gene expression, signaling,  
4 transduction, cell migration, tumorigenesis, angiogenesis, and/or inflammation (41, 56), thereby  
5 forming a novel group of moonlighters in probiotic species.

6  
7 **Fructose and biofilm growth increase the surface-associated aminopeptidase activity in GG**

8 Several components of the proteolytic system (several OppA paralogs, PepC, PepN and PepA)  
9 involved in the utilization of milk casein (19) were identified here as novel moonlighters with  
10 higher abundances on biofilm than planktonic cell surfaces. Among these PepN and the OppA  
11 paralogs were more abundant on or specific to the frc-associated cell surfaces. The enzymatic  
12 assay performed on whole cells using a substrate specific to PepC and PepN confirmed the  
13 identification results and indicated that more PepC than PepN is associated with biofilm cells.  
14 In addition, the classical surface proteases PrtP and PrtR were predicted to be more abundantly  
15 produced on the biofilm cell surfaces. The two identified aminopeptidases are expressed in the  
16 cytoplasm, where they act on the oligopeptides that are taken up by the Opp-transport system.  
17 Thus, efficient surface-aminopeptidase activity could provide the probiotic with means to speed  
18 up growth and adaptation in conditions involving oligopeptides as the carbon source. In a recent  
19 study by Galli et al. (57) GG was utilized as an adjunct starter culture in Camembert-type cheese  
20 production, which was found to improve the sensory characteristics of the cheese. While the  
21 mechanism behind the GG-mediated flavor formation in cheese remains to be elucidated, the  
22 efficient and diversified proteolytic system of the strain could be involved (57). It is highly likely  
23 that the robust GG cells do not undergo autolysis during cheese making, which makes the cell-  
24 surface located moonlighting aminopeptidases C and N interesting objects to be studied further  
25 in this context.

26

1 Several cytoplasmic proteins have been shown to be selectively sorted into membrane vesicles  
2 (MVs), which in some bacteria were shown to contribute to approximately 20% of the whole  
3 biofilm matrix proteome, demonstrating that MVs are also important constituents of the biofilm  
4 matrices (58). Considering this finding, we suggest that among the classical and nonclassical  
5 proteins, PepA, PepN, PepC, the RNA polymerase subunits RpoA and RpoB, an Aes lipase and  
6 stress-chaperone GroEL could be targeted to MVs, which is an important mechanism exploited  
7 by both gram-negative and gram-positive bacteria to export proteins in a protected and  
8 concentrated manner to aid neighboring cells or modulate the host immune system. Taken  
9 together, our findings suggest that the export of many classical and nonclassical proteins could  
10 be enhanced in GG when cells are grown in a biofilm state.

11

## 12 **Surface-antigenicity and adherence of GG by biofilm growth in the presence of frc**

13 Comparison of the total antigenicity profiles of GG cells grown in planktonic and biofilm forms  
14 on glc and frc indicated that frc as the carbon source increases the abundances of many antigens  
15 (~23, 28, 40, 60 and 80 kDa in size) during both growth modes. We previously demonstrated the  
16 presence of several adhesive and antigenic moonlighters at the cell surface of planktonic GG  
17 cells grown on glc (28). In that study, protein moonlighters, such as DnaK (67.2 kDa), GroEL  
18 (57.4 kDa), PYK (62.8 kDa), TF (49.8 kDa), ENO (47.1 kDa), GaPDH (36.7 kDa), L-LDH (35.5  
19 kDa), Eftu (43.6 kDa), Adk (23.7 kDa) and UspA (16.8 kDa), were identified as highly abundant  
20 and antigenic on planktonic GG cells. The present study suggests that PYK, ENO, GaPDH, TF,  
21 L-LDH, Eftu, UspA, DnaK and GroEL could be produced more during biofilm than planktonic  
22 growth, which is also in line with an earlier proteomic study showing that a switch from  
23 planktonic to biofilm growth in *Lactobacillus plantarum* increases the abundances of several  
24 stress responses and glycolytic moonlighters (59). From the identified moonlighters, ENO, IMP,  
25 FBA, TDPA, GreA, GroES and GroEL are plausible factors that aid in biofilm formation in the  
26 presence of frc, as evidenced by surfaceome predictions.



1 The *rmlABCD* operon products, involved in the synthesis of O-antigen lipopolysaccharide (60),  
2 could have conferred increased surface antigenicity to GG cells during biofilm growth. Here, all  
3 of the operon gene products RmlA, RmlB, RmlC and RmlD with glucose-1-phosphate  
4 thymidyltransferase, dTDP-4-dehydrorhamnose 3,5-epimerase, dTDP-4-dehydrorhamnose  
5 reductase and dTDP-glucose-4,6-dehydratase activities, respectively, were detected only in  
6 biofilm cells and with ~2-fold higher abundances in the presence of *frc*. In some pathogens, L-  
7 rhamnose is required for virulence, and the enzymes of the Rml pathway are considered potential  
8 targets in drug design (61). In view of this, detection of the Rml enzymes as moonlighters is  
9 interesting and points towards a novel role of these enzymes at the cell surface of nonpathogenic  
10 bacteria. The rhamnose moiety has also been shown to bind specific moonlighters (e.g., ENO  
11 and 58 other potential moonlighters) at the bacterial cell surface, proposing that rhamnose-  
12 mediated anchoring is a general mechanism for anchoring the moonlighting proteins to the cell  
13 surface in bacteria (62).

14 The specific appearance of MdoB, a phosphoglycerol transferase involved in the biosynthesis of  
15 lipoteichoic acid (LTA), could also be considered a potential antigen in GG. Inactivating the  
16 *mdoB* gene in a probiotic *Lactobacillus acidophilus* (strain NCK2025) was shown to protect  
17 mice against induced colitis (63). Here, two MdoB paralogs of different sizes were increasingly  
18 produced in *frc* biofilms and planktonic cells, and their predicted MWs (78 and 84 kDa) could  
19 explain the increased abundance of an antigen protein band in *frc* samples migrating to  
20 approximately 80 kDa. In relation to MdoB, the identified DltD, encoded by part of the *dltABCD*  
21 operon involved in the formation of lipoteichoic acid (LTA), could have increased antigenicity  
22 in *frc*-associated GG cells. DltD is a single-pass membrane protein involved in the final transfer  
23 of D-alanine residues to LTA on the outside of the cell (64) that contributes to adherence and  
24 biofilm formation (65, 66). LTA has been shown to be essential for biofilm matrix assembly and  
25 bulk accumulation over time (67), and the early stages of biofilm formation necessitates efficient  
26 expression of *dltD* (68). In addition, a lack of DltD has been linked to poor acid survival in

1 planktonic cells and an inability to form biofilms *in vitro* in the presence of sucrose or glucose  
2 (69). As DltD could not be detected in the glc-associated planktonic or biofilm cells, we  
3 hypothesize that such deficiency might also explain the lower biofilm formation efficiency on  
4 glc compared to frc.

5 Many of the classical surface proteins may have also contributed to the total antigenicity and/or  
6 adherence in the GG cells. The most plausible candidates include lipase and lipoproteins (Aes,  
7 AbpE, Cad and CamS), peptidoglycan hydrolases (e.g., the NlpC/P60), mucus-binding factor  
8 (MBF), a lectin-binding protein, penicillin-binding proteins and two pilus proteins (SpaC and  
9 SpaA). From these, the SpaA backbone-pilin subunit, SpaC adhesin and MBF are most known;  
10 the first two are produced through the *spaCBA* operon coding for the pilus, the key factor  
11 promoting biofilm formation *in vitro* as well as colonization and adherence *in vivo* (15, 70),  
12 while MBF has been shown to bind intestinal and porcine colonic mucus, laminin, collagen IV,  
13 and fibronectin (71, 72). Additional mucus-adherence assays with each G cell type in the  
14 presence of anti-SpaC antibodies complemented with indirect ELISA monitoring of the SpaC  
15 abundances indicated the importance of the pilus adhesin in coordinating the adherence in both  
16 the planktonic and biofilm cells. The inability to identify SpaA or SpaC from biofilm-cells  
17 implied that the overwhelming presence of moonlighting proteins on biofilm cell surfaces  
18 accompanied by the complex structure of the pilus adhesin could be the reason why the two pilus  
19 proteins were identified only from the planktonic cells. The same reason applies for the lack of  
20 MabA among the identified surfaceomes. MabA (LGG\_01865), the modulator of adhesion and  
21 biofilm formation, is proposed to strengthen the biofilm structure following the pilus-mediated  
22 interaction with the surface (16).

23 A recent study highlighted an important role of glc and frc, carbohydrates prevalent in the  
24 Western diet, in regulating the colonization of a beneficial microbe independent of supplying  
25 these carbohydrates to the intestinal microbiota (26). In that study, both frc and glc, but not  
26 prebiotics such as fructo-oligosaccharides, were found to silence the two-component system

1 sensor histidine kinase/response regulator Roc that activates transcription of clustered  
2 polysaccharide utilization genes in a widely distributed gut commensal bacterium *B.*  
3 *thetaiotaomicron*. Roc was also suggested to promote gut colonization by interacting with  
4 moonlighting proteins such as GPI or glucose 6-phosphate dehydrogenase (73). From these two  
5 moonlighters, GPI was detected here as a more abundant protein in biofilm cells with a slight  
6 increase in cells grown on glc. As the present study compared surfaceomes of cells grown only  
7 in the presence of simple carbohydrates, we cannot exclude the possibility that corresponding  
8 response regulators (e.g., WalK) could have been modulated by these carbohydrates and that the  
9 two tested carbohydrates could coordinate the colonization of GG *in vivo* in an analogous  
10 manner.

11

## 12 **Conclusions**

13 The present study provides the first in-depth comparison of the planktonic- and biofilm matrix-  
14 associated surfaceomes of GG. We show that cells growing in planktonic and biofilm forms in  
15 the presence of simple carbohydrates in growth medium could be used to modify the surfaceome  
16 composition of this probiotic. We show remarkable differences among the compositions of the  
17 classical and nonclassical surface proteins (moonlighters) that have immunomodulatory,  
18 adherence, protein-folding, proteolytic or hydrolytic activities. Our study also indicated that the  
19 carbon source coordinates protein-mediated biofilm formation, as evidenced by a whole-cell  
20 enzymatic assay measuring the surface-associated aminopeptidase activity on cells cultured on  
21 different carbon sources and with varying carbohydrate concentrations. The total antigenicity  
22 and adherence were higher on biofilm and planktonic cells grown on frc, in which specific  
23 surface-adhesins and/or known and novel moonlighters were the plausible contributory factors.  
24 Our findings also demonstrated the key role of the SpaCBA pilus independent of the growth  
25 mode or carbon source used, whereas the increased protein moonlighting is suggested to  
26 strengthen the biofilm structures and/or aid in cell-cell interactions. The observed phenotypic

1 variations in *L. rhamnosus* GG potentially includes probiotic (adherence and  
2 immunomodulatory) and industrially relevant (proteolytic activity) features. Whether the GG  
3 phenotypes could be modulated in the host or in the food conditions remains to be shown.

4

5

6

7

8

9

10

11

12

13

14

15

16

17

18

19

20

21

22

## 1 **Funding**

2 This study was supported by the Academy of Finland (Grant No. 272363 to PV and 285632 to  
3 VK) and by Sigrid Juselius Foundation's Senior Reseacher's grant to RS

## 5 **Conflict of Interest Statement**

6 The authors declare that the research was conducted in the absence of any commercial or  
7 financial relationships that could be construed as a potential conflict of interest.

## 9 **Author Contributions**

10 KS, PV, TN, PS, VK, RS, AF and JS conceived, designed, performed the experiments, IM  
11 analyzed the data, and KS and PV wrote the manuscript. All authors participated in the revision  
12 of the manuscript and approved the final version.

## 14 **References**

- 15 1. Sanders, M.E., Guarner, F., Guerrant, R., Holt, P. R., Quigley, E.M., Sartor, R.B. et al.  
16 (2013). An update on the use and investigation of probiotics in health and disease. *Gut*  
17 62:787-796. doi: 10.1136/gutjnl-2012-302504.
- 18 2. Goldenberg, J.Z., Yap, C., Lytvyn, L., Lo, C.K., Beardsley, J., Mertz, D., Johnston B.C.  
19 (2017). Probiotics for the prevention of *Clostridium difficile*-associated diarrhea in adults  
20 and children. *Cochrane Database Syst. Rev.* 12: CD006095. doi:  
21 10.1002/14651858.CD006095.
- 22 3. Siezen, R. J., Wilson, G. (2010) Probiotics genomics. *Microb. Biotechnol.* 3:1-9. doi:  
23 10.1111/j.1751-7915.2009.00159.x.
- 24 4. Jones, S. E., Versalovic, J. (2009). Probiotic *Lactobacillus reuteri* biofilms produce  
25 antimicrobial and anti-inflammatory factors. *BMC Microbiol.* 9:35. doi: 10.1186/1471-  
26 2180-9-35
- 27 5. Rieu, A., Aoudia, N., Jegu, G., Chluba, J., Yousfi, N., Briandet, R., et al. (2014). The  
28 biofilm mode of life boosts the anti-inflammatory properties of *Lactobacillus*. *Cell*  
29 *Microbiol.* 16:1836-1853. doi: 10.1111/cmi.12331.

- 1 6. Aoudia, N., Rieu, A., Briandet R., Deschamps J., Chluba J., Jego G., et al. (2016).  
2 Biofilms of *Lactobacillus plantarum* and *Lactobacillus fermentum*: Effect on stress  
3 responses, antagonistic effects on pathogen growth and immunomodulatory properties.  
4 Food Microbiol. 53:51-59. doi: 10.1016/j.fm.2015.04.009.
- 5 7. Flemming, H.C., Wingender, J., Szewzyk, U., Steinberg, P., Rice, S.A., Kjelleberg, S.  
6 (2016). Biofilms: an emergent form of bacterial life. Nat. Rev. Microbiol. 14:563-575. doi:  
7 10.1038/nrmicro.2016.94.
- 8 8. Flemming, H.C., Wingender, J. (2010). The biofilm matrix. Nat. Rev. Microbiol. 8: 623-  
9 633. doi: 10.1038/nrmicro2415.
- 10 9. Olson, J.K., Rager, T.M., Navarro, J.B., Mashburn-Warren, L., Goodman, S.D., Besner,  
11 G.E. (2016). Harvesting the benefits of biofilms: A novel probiotic delivery system for the  
12 prevention of necrotizing enterocolitis. J. Pediatr. Surg. 51:936-941. doi:  
13 10.1016/j.jpedsurg.2016.02.062.
- 14 10. Cheow, W.S., Hadinoto, K. (2013). Biofilm-like *Lactobacillus rhamnosus* probiotics  
15 encapsulated in alginate and carrageenan microcapsules exhibiting enhanced  
16 thermotolerance and freeze-drying resistance. Biomacromolecules 14:3214-3222. doi:  
17 10.1021/bm400853d.
- 18 11. Cheow, W.S., Kiew, T.Y., Hadinoto, K. (2014). Controlled release of *Lactobacillus*  
19 *rhamnosus* biofilm probiotics from alginate-locust bean gum microcapsules. Carbohydr.  
20 Polym. 103:587-595. doi: 10.1016/j.carbpol.2014.01.036.
- 21 12. Kankainen, M., Paulin, L., Tynkkynen, S., von Ossowski, I., Reunanen, J., Partanen, P., et  
22 al. (2009). Comparative genomic analysis of *Lactobacillus rhamnosus* GG reveals pili  
23 containing a human-mucus binding protein. Proc. Nat. Acad. Sci. U. S. A. 106:17193-  
24 17198. doi: 10.1073/pnas.0908876106.
- 25 13. Lebeer, S., Claes, I.J., Verhoeven, T.L., Vanderleyden, J., De Keersmaecker, S. C. (2011)  
26 Exopolysaccharides of *Lactobacillus rhamnosus* GG form a protective shield against  
27 innate immune factors in the intestine. Microb. Biotechnol. 4:368-374. doi:  
28 10.1111/j.1751-7915.2010.00199.x.
- 29 14. Lebeer, S. Verhoeven, T.L., Francius, G., Schoofs, G., Lambrichts, I., Dufrêne, Y.,  
30 Vanderleyden, J., De Keersmaecker, S.C. (2009). Identification of a gene cluster for the  
31 biosynthesis of a long, galactose-rich exopolysaccharide in *Lactobacillus rhamnosus* GG  
32 and functional analysis of the priming glycosyltransferase. Appl. Environ. Microbiol.  
33 75:3554-3563. doi: 10.1128/AEM.02919-08
- 34 15. Lebeer, S., Verhoeven, T.L.A., Velez, M.P., Vanderleyden, J., De Keersmaecker, S.C.J.  
35 (2007) Impact of environmental and genetic factors on biofilm formation by the probiotic

- 1 strain *Lactobacillus rhamnosus* GG. Appl. Environ. Microbiol. 73: 6768-6775. doi:  
2 10.1128/AEM.01393-07.
- 3 16. Velez, M. P., Petrova, M.I., Lebeer, S., Verhoeven, T.L., Claes, I., Lambrichts, I., et al.  
4 (2010). Characterization of MabA, a modulator of *Lactobacillus rhamnosus* GG adhesion  
5 and biofilm formation. FEMS Immunol. Med. Microbiol. 59:386-398. doi:  
6 10.1111/j.1574-695X.2010.00680.x.
- 7 17. Lebeer, S., Verhoeven, T.L., Claes, I.J., De Hertogh, G., Vermeire, S., Buyse, J., Van  
8 Immerseel, F., Vanderleyden, J., De Keersmaecker, S.C. (2011). FISH analysis of  
9 *Lactobacillus* biofilms in the gastrointestinal tract of different hosts. Lett. Appl. Microbiol.  
10 52:220-226. doi: 10.1111/j.1472-765X.2010.02994.x.
- 11 18. de Vos, W.M. (2015). Microbial biofilms and the human intestinal microbiome. NPJ  
12 Biofilms Microbiomes 1:15005. doi: 10.1038/npjbiofilms.2015.5
- 13 19. Savijoki, K., Lietzén, N., Kankainen, M., Alatossava, T., Koskenniemi, K., Varmanen, P.,  
14 Nyman, T. A. (2011). Comparative proteome cataloging of *Lactobacillus rhamnosus*  
15 strains GG and Lc705. J. Proteome Res. 10:3460-3473. doi: 10.1021/pr2000896.
- 16 20. Lebeer, S., De Keersmaecker, S.C., Verhoeven, T.L., Fadda, A.A., Marchal, K.,  
17 Vanderleyden, J. (2007) Functional analysis of *luxS* in the probiotic strain *Lactobacillus*  
18 *rhamnosus* GG reveals a central metabolic role important for growth and biofilm  
19 formation. J. Bacteriol. 189:860-871. doi: 10.1128/JB.01394-06
- 20 21. Jiang, Q., Stamatova, I., Kainulainen, V., Korpela, R., Meurman, J. H. (2016). Interactions  
21 between *Lactobacillus rhamnosus* GG and oral micro-organisms in an *in vitro* biofilm  
22 model. BMC Microbiol 16:149. doi: 10.1186/s12866-016-0759-7.
- 23 22. Jiang, Q., Kainulainen, V., Stamatova, I., Korpela, R., Meurman, J. H. (2018).  
24 *Lactobacillus rhamnosus* GG in experimental oral biofilms exposed to different  
25 carbohydrate sources. Caries Res. 52:220-229. doi: 10.1159/000479380.
- 26 23. Corcoran, B. M., Stanton, C., Fitzgerald, G.F., Ross, R.P. (2005). Survival of probiotic  
27 lactobacilli in acidic environments is enhanced in the presence of metabolizable sugars.  
28 Appl. Environ. Microbiol. 71:3060-3067. doi:10.1128/AEM.71.6.3060-3067.2005
- 29 24. Lee, Y.K., Puong, K.Y. (2002). Competition for adhesion between probiotics and human  
30 gastrointestinal pathogens in the presence of carbohydrate. Br. J. Nutr. 1: 101-108. doi:  
31 10.1079/BJN2002635.
- 32 25. Jiang, Q., Stamatova, I., Kari, K., Meurman, J.H. (2015) Inhibitory activity *in vitro* of  
33 probiotic lactobacilli against oral *Candida* under different fermentation conditions. Benef.  
34 Microbes. 6:361-368. doi: 10.3920/BM2014.0054

- 1 26. Townsend II, G.E, Han, W., Schwalm III, N.D., Raghavan, V., Barry, N.A., Goodman,  
2 A.L., Groisman, E.A. (2019) Dietary sugar silences a colonization factor in a mammalian  
3 gut symbiont. Proc. Nat. Acad. Sci. U. S. A. 116:233-238. doi: 10.1073/pnas.1813780115.
- 4 27. Sandberg, M., Määttänen, A., Peltonen, J., Vuorela, P.M., Fallarero, A. (2008)  
5 Automating a 96-well microtitre plate model for *Staphylococcus aureus* biofilms: an  
6 approach to screening of natural antimicrobial compounds. Int. J. Antimicrob. Agents.  
7 32:233-240. doi: 10.1016/j.ijantimicag.2008.04.022.
- 8 28. Espino, E., Koskenniemi, K., Mato-Rodriguez, L., Nyman, T.A., Reunanen, J., Koponen,  
9 J., et al. (2015). Uncovering surface-exposed antigens of *Lactobacillus rhamnosus* by cell  
10 shaving proteomics and two-dimensional immunoblotting. J. Proteome Res. 14:1010-  
11 1024. doi: 10.1021/pr501041a.
- 12 29. Vesterlund, S., Karp, M., Salminen, S., Ouwehand, A.C. (2006). *Staphylococcus aureus*  
13 adheres to human intestinal mucus but can be displaced by certain lactic acid bacteria.  
14 Microbiology 152:1819-1826. doi: 10.1099/mic.0.28522-0.
- 15 30. Kainulainen, V., Reunanen, J., Hiippala, K., Guglielmetti, S., Vesterlund, S., Palva, A.,  
16 Satokari, R. (2013). BopA does not have a major role in the adhesion of *Bifidobacterium*  
17 *bifidum* to intestinal epithelial cells, extracellular matrix proteins, and mucus. Appl.  
18 Environ. Microbiol. 79:6989-6997. doi: 10.1128/AEM.01993-13.
- 19 31. Tytgat, H.L., Schoofs, G., Vanderleyden, J., Van Damme, E.J., Wattiez, R., Lebeer, S.,  
20 Leroy, B. (2016). Systematic exploration of the glycoproteome of the beneficial gut isolate  
21 *Lactobacillus rhamnosus* GG. J. Mol. Microbiol. Biotechnol. 26:345-358. doi:  
22 10.1159/000447091.
- 23 32. Kainulainen, V., Loimaranta, V., Pekkala, A., Edelman, S., Antikainen, J., Kylväjä, et al.  
24 (2012). Glutamine synthetase and glucose-6-phosphate isomerase are adhesive  
25 moonlighting proteins of *Lactobacillus crispatus* released by epithelial cathelicidin LL-37.  
26 J. Bacteriol. 194:2509-2519. doi:10.1128/JB.06704-11.
- 27 33. Elias, J.E., Gygi, S.P. (2007). Target-decoy search strategy for increased confidence in  
28 large-scale protein identifications by mass spectrometry. Nat. Methods 4:207-14. doi:  
29 10.1038/nmeth1019.
- 30 34. Ishihama Y., Oda Y., Tabata T., Sato T., Nagasu T., Rappsilber J., Mann M. (2005).  
31 Exponentially modified protein abundance index (emPAI) for estimation of absolute  
32 protein amount in proteomics by the number of sequenced peptides per protein. Mol. Cell.  
33 Proteomics 4:1265-1272. doi: 0.1074/mcp.M500061-MCP200.



- 1 35. Wei, R., Wang, J., Su, M., Jia, E., Chen, S., Chen, T., Ni, Y. (2018). Missing value  
2 imputation approach for mass spectrometry-based metabolomics data. *Sci. Rep.* 8:663.  
3 doi:10.1038/s41598-017-19120-0.
- 4 36. Wei, R., Wang, J., Jia, E., Chen, T., Ni, Y., Jia, W. (2018). GSimp: A Gibbs samples  
5 based left-censored missing value imputation approach for metabolomics studies. *PLoS*  
6 *Comput Biol.* 14:e1005973. doi:10.1371/journal.pcbi.1005973.
- 7 37. Varmanen, P., Vesanto, E., Steele, J.L., Palva, A. (1994). Characterization and expression  
8 of the *pepN* gene encoding a general aminopeptidase from *Lactobacillus helveticus*. *FEMS*  
9 *Microbiol. Lett.* 124:315-320.
- 10 38. Doron, S., Snyderman, D.R. Gorbach, S. L. (2005). *Lactobacillus* GG: bacteriology and  
11 clinical applications. *Gastroenterol. Clin. N.* 34:483-498. doi: 10.1016/j.gtc.2005.05.011
- 12 39. Welch, K., Yanling, C., Strømme, M. (2012). A method for quantitative determination of  
13 biofilm viability. *J. Funct. Biomaterials.* 3:3418-3431. doi: 10.3390/jfb3020418.
- 14 40. Santhanalakshmi, J., Balaji, S. (2001). Binding studies of crystal violet on proteins.  
15 *Colloids and Surfaces A: Physicochemical Engin. Aspects.* 186:173-177. doi:  
16 10.1016/S0927-7757(00)00824-4.
- 17 41. Chen, C., Zabad, S., Liu, H., Wang, W., Jeffery, C. (2018). MoonProt 2.0: an expansion  
18 and update of the moonlighting proteins database. *Nucleic Acids Res.* 46:D640-D644. doi:  
19 10.1093/nar/gkx104.
- 20 42. Kainulainen, V., Korhonen, T.K. (2014). Dancing to another tune-adhesive moonlighting  
21 proteins in bacteria. *Biology* 3:178-204. doi: 10.3390/biology3010178
- 22 43. Foulston, L., Elsholz, A.K., DeFrancesco, A.S., Losick, R. (2014). The extracellular  
23 matrix of *Staphylococcus aureus* biofilms comprises cytoplasmic proteins that associate  
24 with the cell surface in response to decreasing pH. *MBio* 5:e01667-14. doi:  
25 10.1128/mBio.01667-14.
- 26 44. Graf, A. L., Schäuble, M., Rieckmann, L. M., Hoyer, J., Maaß, S., Lalk, M., et al. (2019)  
27 Virulence factors produced by *Staphylococcus aureus* biofilms have a moonlighting  
28 function contributing to biofilm integrity. *Molecular & Cellular Proteomics*,  
29 mcp.RA118.001120, doi: 10.1074/mcp.RA118.001120
- 30 45. Wang, W., Jeffery, C.J. (2016). An analysis of surface proteomics results reveals novel  
31 candidates for intracellular/surface moonlighting proteins in bacteria. *Mol. Biosyst.*  
32 12:1420-1431. doi: 10.1039/c5mb00550g.
- 33 46. Holland, I.B., Peherstorfer, S., Kanonenberg, K., Lenders, M., Reimann, S., Schmitt, L.  
34 (2016). Type I protein secretion-deceptively simple yet with a wide range of mechanistic  
35 variability across the family. *EcoSal Plus.* 7. doi: 10.1128/ecosalplus.ESP-0019-2015.

- 1 47. Kontinen, V.P., Sarvas, M. (1993). The PrsA lipoprotein is essential for protein secretion  
2 in *Bacillus subtilis* and sets a limit for high-level secretion. *Mol. Microbiol.* 8:727-737.  
3 doi: 10.1111/j.1365-2958.1993.tb01616.x.
- 4 48. Chen, J., Gai, Y., Fu, G., Zhou, W., Zhang, D., and Wen, J. (2015). Enhanced extracellular  
5 production of  $\alpha$ -amylase in *Bacillus subtilis* by optimization of regulatory elements and  
6 over-expression of PrsA lipoprotein. *Biotechnol Lett.* 37, 899-906. doi: 10.1007/s10529-  
7 014-1755-3.
- 8 49. Jakob, R.P., Koch, J.R., Burmann, B.M., Schmidpeter, P.A., Hunkeler, M., Hiller, S., et al.  
9 (2015). Dimeric structure of the bacterial extracellular foldase PrsA. *J. Biol. Chem.* 290:  
10 3278-3292. doi: 10.1074/jbc.M114.622910.
- 11 50. Poquet, I., Saint, V., Sez nec, E., Simoes, N., Bolotin, A., Gruss, A. (2000). HtrA is the  
12 unique surface housekeeping protease in *Lactococcus lactis* and is required for natural  
13 protein processing. *Mol. Microbiol.* 35:1042-1051. doi: 10.1046/j.1365-  
14 2958.2000.01757.x
- 15 51. Biswas, S., Biswas, I. (2005). Role of HtrA in surface protein expression and biofilm  
16 formation by *Streptococcus mutans*. *Infect. Immun.* 73:6923-6934.  
17 doi:10.1128/IAI.73.10.6923-6934.2005.
- 18 52. Koch, M., Flür, S., Kreutz, C., Ennifar, E., Micura, R, Polacek, R. (2015). Role of a  
19 ribosomal RNA phosphate oxygen during the EF-G-triggered GTP hydrolysis. *Proc. Natl.*  
20 *Acad. Sci. U.S.A.* 112:E2561-E2568. doi: 10.1073/pnas.1505231112.
- 21 53. Liu, X.D., Xie, L., Wei, Y., Zhou, X., Jia, B., Liu, J., Zhang, S. (2014). Abiotic stress  
22 resistance, a novel moonlighting function of ribosomal protein RPL44 in the halophilic  
23 fungus *Aspergillus glaucus*. *Appl. Environ. Microbiol.* 80:4294-4300. doi:  
24 10.1128/AEM.00292-14.
- 25 54. Henderson, B, Fares, M.A., Martin, A.C.R. (2016) “Ribosomal Moonlighting proteins” in  
26 the Protein Moonlighting in Biology and Medicine (John Wiley & Sons, Inc.), 115-119.  
27 doi:10.1002/9781118952108.
- 28 55. Hoffmann, A., Bukau, B., Kramer, G. (2010). Structure and function of the molecular  
29 chaperone trigger factor. *Biochim. Biophys. Acta* 1803:650-661. doi:  
30 10.1016/j.bbamcr.2010.01.017.
- 31 56. Son, S.H., Park, M.C., Kim, S. (2014). Extracellular activities of aminoacyl-tRNA  
32 synthetases: new mediators for cell-cell communication. *Top Curr. Chem.* 344:145-166.  
33 doi: 10.1007/128\_2013\_476.
- 34 57. Galli B.D., Baptista, D.P. Cavalheiro, F.G., Gigante, M.L. (2019). *Lactobacillus*  
35 *rhamnosus* GG improves the sensorial profile of Camembert-type cheese: An approach

- 1 through flash-profile and CATA. LWT. In Press, Accepted Manuscript.  
2 <https://doi.org/10.1016/j.lwt.2019.02.077>.
- 3 58. Couto, N., Schooling, S.R., Dutcher, J.R., Barber, J. (2015). Proteome profiles of outer  
4 membrane vesicles and extracellular matrix of *Pseudomonas aeruginosa* biofilms. J.  
5 Proteome Res. 14:4207-4222. doi: 10.1021/acs.jproteome.5b00312.
- 6 59. De Angelis, M., Siragusa, S., Campanella, D., Di Cagno, R., Gobbetti, M. (2015).  
7 Comparative proteomic analysis of biofilm and planktonic cells of *Lactobacillus*  
8 *plantarum* DB200. Proteomics 15:2244-2257. doi: 10.1002/pmic.201400363.
- 9 60. Reeves, P. Evolution of *Salmonella* O antigen variation by interspecific gene transfer on a  
10 large scale. Trends Genet. 9:17-22. doi: 10.1016/0168-9525(93)90067-R.
- 11 61. Trent, M.S., Stead, C.M., Tran, A.X., Hankins, J.V. (2006). Diversity of endotoxin and its  
12 impact on pathogenesis. J. Endotoxin Res. 12:205-223. doi: 10.1179/096805106X118825.
- 13 62. Daubenspeck, J.M., Liu, R., Dybvig, K. (2016). Rhamnose links moonlighting proteins to  
14 membrane phospholipid in *Mycoplasm*as. PLoS One. 11:e0162505. doi:  
15 10.1371/journal.pone.0162505.
- 16 63. Shiraishi, T., Yokota, S., Fukiya, S., Yokota, A. (2016). Structural diversity and biological  
17 significance of lipoteichoic acid in Gram-positive bacteria: focusing on beneficial  
18 probiotic lactic acid bacteria. Biosci. Microbiota Food Health. 35:147–161. doi:  
19 10.12938/bmfh.2016-006.
- 20 64. Reichmann, N.T., Cassona, C.P., Gründling, A. (2013). Revised mechanism of d-alanine  
21 incorporation into cell wall polymers in Gram-positive bacteria. Microbiology 159:1868-  
22 1877. doi: 10.1099/mic.0.069898-0.
- 23 65. Spatafora, G.A., Sheets, M., June, R., Luyimbazi, D., Howard, K., Hulbert, R., et al.  
24 (1999). Regulated expression of the *Streptococcus mutans* *dlt* genes correlates with  
25 intracellular polysaccharide accumulation. J. Bacteriol. 181:2363-2372.
- 26 66. Gross, M., Cramton, S.E., Götz, F., Peschel, A. (2001). Key role of teichoic acid net  
27 charge in *Staphylococcus aureus* colonization of artificial surfaces. Infect Immun.  
28 69:3423-3426. doi: 10.1128/IAI.69.5.3423-3426.2001
- 29 67. Castillo Pedraza, M.C., Novais, T.F, Faustoferri, R.C., Quivey, R.G., Terekhov, A.,  
30 Hamaker, B.R., Klein, M.I. (2017). Extracellular DNA and lipoteichoic acids interact with  
31 exopolysaccharides in the extracellular matrix of *Streptococcus mutans* biofilms.  
32 Biofouling 33:722-740. doi: 10.1080/08927014.2017.1361412.
- 33 68. Klein, M.I., Xiao, J., Lu, B., Delahunty, C.M., Yates, J.R., Koo, H. (2012). *Streptococcus*  
34 *mutans* protein synthesis during mixed-species biofilm development by high-throughput  
35 quantitative proteomics. PLoS One 7:e45795. doi: 10.1371/journal.pone.0045795.

- 1 69. Quivey, R.G., Jr., Grayhack, E.J., Faustoferri, R.C., Hubbard, C.J., Baldeck, J.D., Wolf,  
2 A.S., et al. (2015). Functional profiling in *Streptococcus mutans*: construction and  
3 examination of a genomic collection of gene deletion mutants. *Mol. Oral Microbiol.*  
4 30:474-495. doi: 10.1111/omi.2015.30.issue-6.
- 5 70. Lebeer, S., Claes, I., Tytgat, H.L., Verhoeven, T.L., Marien, E., von Ossowski, I., et al.  
6 (2012). Functional analysis of *Lactobacillus rhamnosus* GG pili in relation to adhesion  
7 and immunomodulatory interactions with intestinal epithelial cells. *Appl. Environ.*  
8 *Microbiol.* 78:185-193. doi: 10.1128/AEM.06192-11.
- 9 71. von Ossowski, I., Satokari, R., Reunanen, J., Lebeer, S., De Keersmaecker, S.C.J.,  
10 Vanderleyden, J. et al. (2011). Functional characterization of a mucus-specific LPXTG  
11 surface adhesin from probiotic *Lactobacillus rhamnosus* GG. *Appl. Environ. Microbiol.*  
12 77:4465-4472. doi: 10.1128/AEM.02497-10.
- 13 72. Nishiyama, K., Nakamata, K., Ueno, S., Terao, A., Aryantini, N.P., Sujaya, I.N., et al.  
14 (2015). Adhesion properties of *Lactobacillus rhamnosus* mucus-binding factor to mucin  
15 and extracellular matrix proteins. *Biosci. Biotechnol. Biochem.* 79:271-279. doi:  
16 10.1080/09168451.2014.972325.
- 17 73. Sonnenburg, E.D., Sonnenburg, J.L., Manchester, J.K., Hansen, E.E., Chiang, H.C.,  
18 Gordon, J.I. (2006). A hybrid two-component system protein of a prominent human gut  
19 symbiont couples glycan sensing *in vivo* to carbohydrate metabolism. *Proc. Natl. Acad.*  
20 *Sci. U.S.A.* 103:8834-8839. 10.1073/pnas.0603249103.

21  
22  
23  
24  
25  
26  
27  
28  
29  
30  
31  
32  
33  
34  
35

Fig. 1

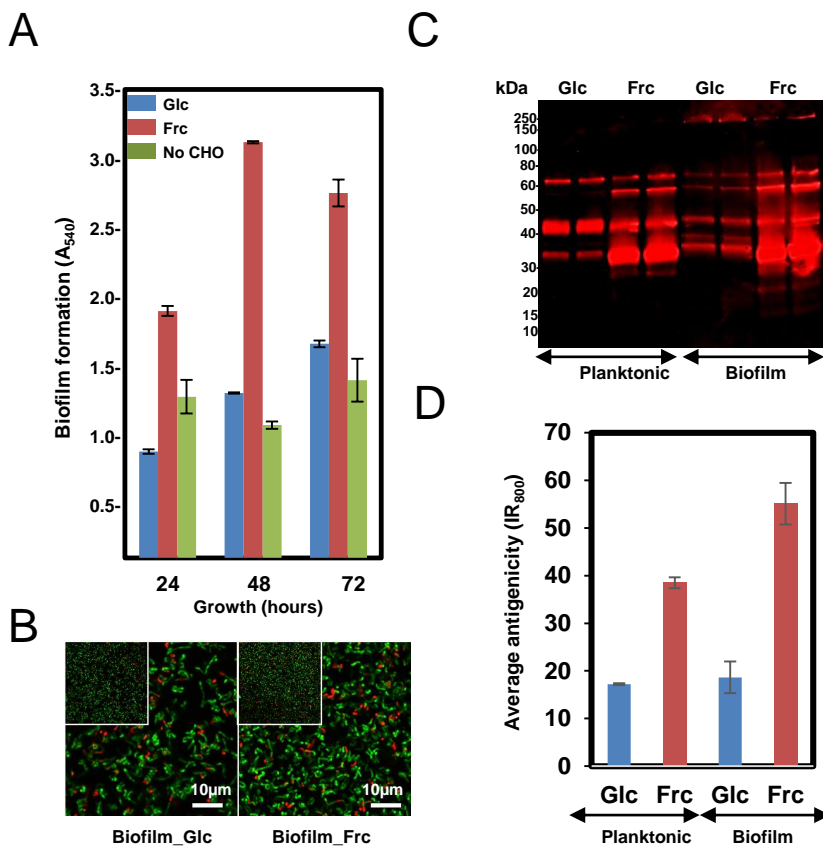

1        **Figure 1.** Assessing the biofilm formation of the GG cells in MRS in the presence 2% glc,  
2        2% frc or without carbohydrate (CHO) under anaerobic conditions (5% CO<sub>2</sub>). **A)** Biofilm  
3        formation efficiency of the GG cells in the presence of frc and glc on flat-bottom  
4        polystyrene wells at indicated time points of incubation. **B)** Fluorescence images of 48 h  
5        old biofilms prepared in the presence of glc and frc. Biofilms were stained with the  
6        LIVE/DEAD *BacLight* kit with Syto9 for staining viable cells and PI for dead cells. The  
7        scale bar is 10 μm. **C)** 1-DE immunoblot analysis of planktonic and biofilm GG cells  
8        using anti-GG antibodies targeting the surface-associated proteins. The surface proteins  
9        were isolated from 24 h old (planktonic) and 48-h-old (biofilms) cells, and the amounts of  
10       samples separated by 1-DE were normalized to cell density. The antigen profiles were  
11       detected using an Odyssey® infrared imaging system. **D)** Total fluorescence of each 1-  
12       DE antigen profile was quantified using the AlphaImager gel documentation and image  
13       analysis system.

14  
15  
16  
17  
18  
19  
20  
21  
22  
23  
24  
25  
26  
27  
28  
29  
30  
31  
32  
33  
34

Fig. 2

0.1101/579953; this version posted March 18, 2019. The copyright holder for this preprint (which was not certified by peer review) is the author/funder, who has granted bioRxiv a license to display the preprint in perpetuity. It is made available under aCC-BY-ND 4.0 International license.

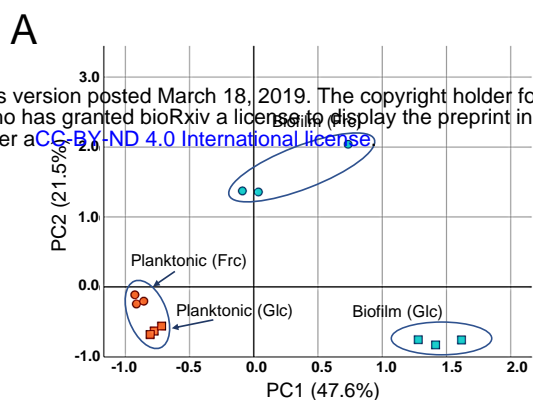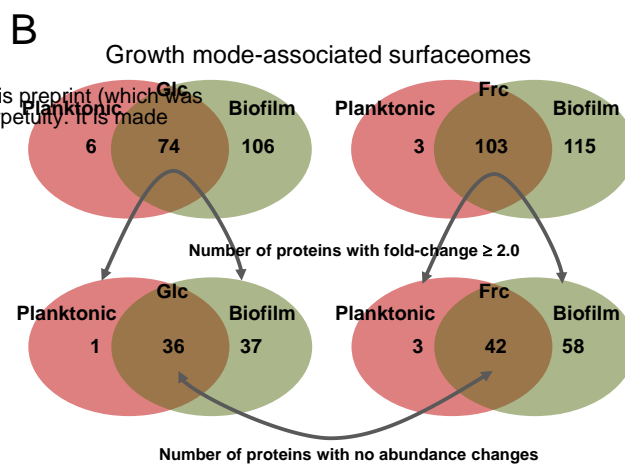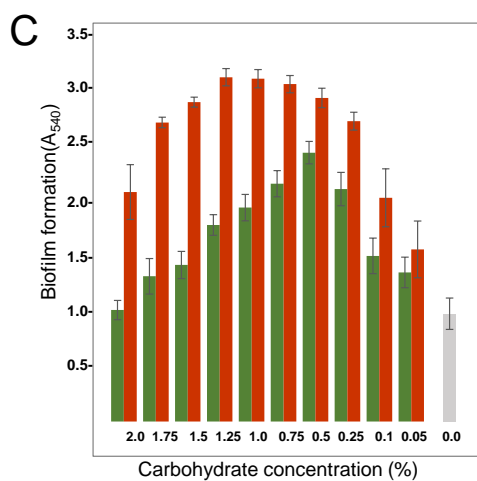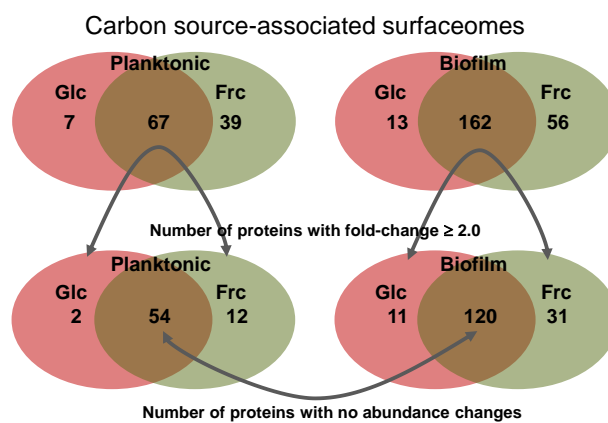

1        **Figure 2. (A)** Surfaceome variability among GG cells cultured under four different  
2        conditions (two carbon sources and two growth modes) assessed by PCA. PC1 (growth  
3        mode) accounts for 47.6% and PC2 (carbon source) accounts for 21.5% of the variation.  
4        **(B)** Venn diagrams indicate the number of commonly and specifically identified  
5        surfaceome proteins. **(C)** Biofilm formation of GG in varying concentrations of fructose  
6        (red bars) and glucose (green bars) and with no carbohydrate (grey bar). The biofilm  
7        formation efficiency was monitored after 48 h of incubation at 37 °C in the presence of  
8        5% CO<sub>2</sub>.

9  
10  
11  
12  
13  
14  
15  
16  
17  
18  
19  
20  
21  
22  
23  
24  
25  
26  
27  
28  
29  
30  
31  
32  
33  
34  
35



# Fig. 3

| Acc. no.       | Protein name    | Description                                                     | Glucose |    | Fructose |    |
|----------------|-----------------|-----------------------------------------------------------------|---------|----|----------|----|
|                |                 |                                                                 | BC      | PC | BC       | PC |
| YP_003170188.1 | SoaA            | SoaA backbone-pilin subunit                                     |         |    |          |    |
| YP_003170190.1 | SoaC            | SoaC pilus adhesin                                              |         |    |          |    |
| YP_003170070.1 | YP_003170070.1  | NlpC/P60 cell wall glycoside hydrolase                          |         |    |          |    |
| YP_003171971.1 | YP_003171971.1  | MltA-like lytic hydrolase                                       |         |    |          |    |
| YP_003169777.1 | YP_003169777.1  | CHAP-domain containing peptidoglycan hydrolase                  |         |    |          |    |
| YP_003171762.1 | YP_003171762.1  | NlpC/P60 family peptidoglycan hydrolase                         |         |    |          |    |
| YP_003170423.1 | Aes             | Esterase/lipase (LGG_00677) - Aes                               |         |    |          |    |
| YP_003171611.1 | YP_003171611.1  | Extracellular matrix binding protein (LPXTG anchor)             |         |    |          |    |
| YP_003170763.1 | CamS            | Lipoprotein                                                     |         |    |          |    |
| YP_003172053.1 | Cad             | Lipoprotein                                                     |         |    |          |    |
| YP_003170614.1 | ApbE            | Thiamine biosynthesis lipoprotein                               |         |    |          |    |
| YP_003172083.1 | YP_003172083.1  | Mucus binding factor (LGG_02337)(LPXTG anchor)                  |         |    |          |    |
| YP_003171233.1 | PbP1A           | Penicillin-binding protein                                      |         |    |          |    |
| YP_003170540.1 | PbP1B           | Penicillin-binding protein                                      |         |    |          |    |
| YP_003171452.1 | PbP2            | Penicillin-binding protein                                      |         |    |          |    |
| YP_003170128.1 | PbB3            | Penicillin-binding protein                                      |         |    |          |    |
| YP_003171026.1 | PbP2X-like/FtsI | Penicillin binding protein                                      |         |    |          |    |
| YP_003171526.1 | PrsA            | Peptidylprolyl cis-trans isomerase                              |         |    |          |    |
| YP_003172552.1 | HtrA            | Serine-type protease                                            |         |    |          |    |
| YP_003170526.1 | DHd             | Extramembranal protein                                          |         |    |          |    |
| YP_003170333.1 | LGG_00587       | Lectin binding protein                                          |         |    |          |    |
| YP_003172665.1 | YP_003172665.1  | ABC transporter - MFP/HlyD                                      |         |    |          |    |
| YP_003172607.1 | GlnQ            | Glutamine ABC transporter ATP-binding protein                   |         |    |          |    |
| YP_003170435.1 | YP_003170435.1  | ABC transporter substrate-binding protein                       |         |    |          |    |
| YP_003170718.1 | YP_003170718.1  | ABC transporter spermidine/butrescine-binding protein           |         |    |          |    |
| YP_003172169.1 | YP_003172169.1  | ABC transporter metal ion transporter substrate binding protein |         |    |          |    |
| YP_003170942.1 | YP_003170942.1  | ABC transporter (MetQ/NlpA family)                              |         |    |          |    |
| YP_003171105.1 | YP_003171105.1  | PTS system fructose-specific transporter subunit IIABC          |         |    |          |    |
| YP_003172582.1 | YP_003172582.1  | PTS system fructose-specific transporter subunit IID            |         |    |          |    |
| YP_003170092.1 | YP_003170092.1  | PTS system galactitol-specific transporter subunit IIB          |         |    |          |    |
| YP_003169822.1 | YP_003169822.1  | Glycine/betaine ABC transporter substrate-binding protein       |         |    |          |    |
| YP_003171892.1 | YP_003171892.1  | Glycine/betaine ABC transporter substrate-binding protein       |         |    |          |    |
| YP_003172165.1 | YP_003172165.1  | Manganese ABC transporter substrate-binding protein             |         |    |          |    |
| YP_003170075.1 | YP_003170075.1  | ABC transporter substrate-binding protein                       |         |    |          |    |
| YP_003172597.1 | YP_003172597.1  | ABC transporter substrate-binding protein                       |         |    |          |    |
| YP_003170927.1 | AtpA            | F0F1 ATP synthase subunit alpha                                 |         |    |          |    |
| YP_003170930.1 | AtpD            | F0F1 ATP synthase subunit beta                                  |         |    |          |    |
| YP_003172480.1 | PrtR            | Cell envelope-associated proteinase. lactocepin                 |         |    |          |    |
| YP_003172020.1 | PrtP            | Endopeptidase lactocepin (LPXTG)                                |         |    |          |    |
| YP_003169984.1 | Pcp             | Pyrrolidone-carboxylate peptidase                               |         |    |          |    |
| YP_003172562.1 | OdpA            | Oligopeptide ABC transporter                                    |         |    |          |    |
| YP_003171691.1 | OdpA            | Oligopeptide ABC transporter                                    |         |    |          |    |
| YP_003171398.1 | OdpA            | Oligopeptide ABC transporter                                    |         |    |          |    |
| YP_003169947.1 | OdpA            | Oligopeptide ABC transporter                                    |         |    |          |    |
| YP_003171812.1 | OdpA            | Oligopeptide ABC transporter                                    |         |    |          |    |
| YP_003170970.1 | OdpA            | Oligopeptide ABC transporter                                    |         |    |          |    |
| YP_003171102.1 | OdpA            | Oligopeptide ABC transporter                                    |         |    |          |    |
| YP_003170680.1 | PGK             | Phosphoglycerate kinase                                         |         |    |          |    |
| YP_003170681.1 | TPI             | Triosephosphate isomerase                                       |         |    |          |    |
| YP_003170682.1 | ENO             | Enolase                                                         |         |    |          |    |
| YP_003170679.1 | GaPDH           | Glyceraldehyde-3-phosphate dehydrogenase                        |         |    |          |    |
| YP_003170831.1 | GPI             | Glucose-6-phosphate isomerase                                   |         |    |          |    |
| YP_003171121.1 | PYK             | Pyruvate kinase                                                 |         |    |          |    |
| YP_003171473.1 | 6-PGD           | 6-phosphogluconate dehydrogenase                                |         |    |          |    |
| YP_003171120.1 | 6-PFK           | 6-phosphofructokinase                                           |         |    |          |    |
| YP_003170728.1 | PPGM            | Phosphoglucosamine mutase                                       |         |    |          |    |
| YP_003171097.1 | TF              | Trigger factor                                                  |         |    |          |    |
| YP_003170667.1 | PPG             | Phosphoglucosmutase                                             |         |    |          |    |
| YP_003171884.1 | PGM             | Phosphoglyceromutase                                            |         |    |          |    |
| YP_003170270.1 | FBA             | Fructose-bisphosphate aldolase                                  |         |    |          |    |
| YP_003171066.1 | PDHA1           | Pyruvate dehydrogenase                                          |         |    |          |    |
| YP_003171067.1 | AcoB            | Alpha-ketoacid dehydrogenase                                    |         |    |          |    |
| YP_003171566.1 | PtsI            | Phosphoenolpyruvate - protein phosphotransferase                |         |    |          |    |
| YP_003169995.1 | IMP             | Inosine-5'-monophosphate dehydrogenase                          |         |    |          |    |
| YP_003171442.1 | GlnA            | Glutamine synthetase                                            |         |    |          |    |
| YP_003171088.1 | EFTU            | Elongation factor                                               |         |    |          |    |
| YP_003171373.1 | EFTS            | Elongation factor                                               |         |    |          |    |
| YP_003172239.1 | EfG             | Elongation factor                                               |         |    |          |    |
| YP_003171459.1 | GreA            | Transcription elongation factor                                 |         |    |          |    |
| YP_003172207.1 | RpoA            | DNA-directed RNA polymerase subunit alpha                       |         |    |          |    |
| YP_003172243.1 | RpoC            | DNA-directed RNA polymerase subunit beta'                       |         |    |          |    |
| YP_003172244.1 | RpoB            | DNA-directed RNA polymerase subunit beta                        |         |    |          |    |
| YP_003169993.1 | EnqD            | GTP-dependent nucleic acid-binding protein                      |         |    |          |    |
| YP_003171493.1 | IF-3            | Translation initiation factor                                   |         |    |          |    |
| YP_003172211.1 | IF-1            | Translation initiation factor                                   |         |    |          |    |
| YP_003171358.1 | IF-2            | Translation initiation factor                                   |         |    |          |    |
| YP_003170036.1 | YP_003170036.1  | LytR family transcriptional regulator                           |         |    |          |    |
| YP_003170954.1 | UspA            | Universal stress protein                                        |         |    |          |    |
| YP_003170421.1 | sHSP            | Small heat shock protein                                        |         |    |          |    |
| YP_003172550.1 | sHSP            | Small heat shock protein                                        |         |    |          |    |
| YP_003170818.1 | CspC            | CspA family cold shock protein                                  |         |    |          |    |
| YP_003171350.1 | DnaK            | Molecular chaperone                                             |         |    |          |    |
| YP_003171985.1 | GroEL           | Molecular chaperone                                             |         |    |          |    |
| YP_003171986.1 | GroES           | Co-chaperonin                                                   |         |    |          |    |

1        **Figure 3.** A heat map comparing the most distinctive protein abundance changes  
2        (estimated by the emPAI values) among the classical surface proteins anchored to cell-  
3        wall/-membrane via motifs or domains (names shaded in grey) and among known and/or  
4        adhesive moonlighters (names shaded in light green). Red and green refer to higher and  
5        lower protein abundances, respectively.

6  
7  
8  
9  
10  
11  
12  
13  
14  
15  
16  
17  
18  
19  
20  
21  
22  
23  
24  
25  
26  
27  
28  
29  
30  
31  
32  
33  
34

Fig. 4

| Acc. no.       | Protein name   | Description                                       | Glucose |       | Fructose |       |
|----------------|----------------|---------------------------------------------------|---------|-------|----------|-------|
|                |                |                                                   | BC      | PC    | BC       | PC    |
| YP_003170300.1 | PeoN           | Aminopeptidase                                    |         |       |          |       |
| YP_003172092.1 | PeoC           | Aminopeptidase                                    | Red     | Green | Red      | Green |
| YP_003170904.1 | PeoA           | Dipeptidase                                       | Red     | Green | Red      | Green |
| YP_003170000.1 | DacC           | D-alanyl-D-alanine carboxypeptidase - DacC        | Red     | Green | Red      | Green |
| YP_003172659.1 | GPD            | Glucosamine-6-phosphate deaminase                 | Red     | Green | Red      | Green |
| YP_003170729.1 | GFAT           | Glucosamine-fructose-6-phosphate aminotransferase | Red     | Green | Red      | Green |
| YP_003171163.1 | GMR            | Galactose mutarotase                              | Red     | Green | Red      | Green |
| YP_003170270.1 | FBA            | Fructose-bisphosphate aldolase                    | Red     | Green | Red      | Green |
| YP_003172321.1 | TDPA           | Taqatose 1,6-diphosphate aldolase                 | Red     | Green | Red      | Green |
| YP_003170079.1 | FrlB           | Fructoselysine-6-P-deqlvcase                      | Red     | Green | Red      | Green |
| YP_003172307.1 | Ropk           | Ribose-phosphate pyrophosphokinase                | Red     | Green | Red      | Green |
| YP_003171742.1 | RmiD           | dTDP-4-dehydrothamnose reductase                  | Red     | Green | Red      | Green |
| YP_003171743.1 | RmiB           | dTDP-glucose 4,6-dehydratase                      | Red     | Green | Red      | Green |
| YP_003171744.1 | RmiC           | dTDP-4-dehydrothamnose 3,5-epimerase              | Red     | Green | Red      | Green |
| YP_003171745.1 | RmiA           | Glucose-1-phosphate thymidylvltransferase         | Red     | Green | Red      | Green |
| YP_003172269.1 | L-LDH          | L-lactate dehydrogenase                           | Red     | Green | Red      | Green |
| YP_003169904.1 | D-LDH          | D-lactate dehydrogenase                           | Red     | Green | Red      | Green |
| YP_003170576.1 | MdoB           | Phosphoglycerol transferase                       | Red     | Green | Red      | Green |
| YP_003170828.1 | MdoB           | Phosphoglycerol transferase                       | Red     | Green | Red      | Green |
| YP_003171011.1 | MreB           | Rod shape-determining protein                     | Red     | Green | Red      | Green |
| YP_003170677.1 | ClpP           | Clp peptidolytic subunit                          | Red     | Green | Red      | Green |
| YP_003171113.1 | ClpB           | Clp ATPase                                        | Red     | Green | Red      | Green |
| YP_003171569.1 | ClpA           | Clp ATPase                                        | Red     | Green | Red      | Green |
| YP_003171781.1 | ClpL           | Clp ATPase                                        | Red     | Green | Red      | Green |
| YP_003172245.1 | ClpC           | Clp ATPase                                        | Red     | Green | Red      | Green |
| YP_003171041.1 | TelA           | Tellurite resistance protein                      | Red     | Green | Red      | Green |
| YP_003171214.1 | YP_003171214.1 | Nitroreductase family protein                     | Red     | Green | Red      | Green |
| YP_003172330.1 | MetS           | Methionyl-tRNA synthetase                         | Red     | Green | Red      | Green |
| YP_003170513.1 | AlaS           | Alaninyl-tRNA synthetase                          | Red     | Green | Red      | Green |
| YP_003172254.1 | LvsS           | Lysyl-tRNA synthetase                             | Red     | Green | Red      | Green |
| YP_003170594.1 | LeuS           | Leucyl-tRNA synthetase                            | Red     | Green | Red      | Green |
| YP_003171237.1 | AsnC           | Asparaginyl-tRNA synthetase                       | Red     | Green | Red      | Green |
| YP_003171307.1 | AspS           | Aspartyl-tRNA synthetase                          | Red     | Green | Red      | Green |
| YP_003171364.1 | ProS           | Prolyl-tRNA synthetase                            | Red     | Green | Red      | Green |
| YP_003171500.1 | ThrS           | Threonyl-tRNA synthetase                          | Red     | Green | Red      | Green |
| YP_003171639.1 | SerS           | Seryl-tRNA synthetase                             | Red     | Green | Red      | Green |
| YP_003172078.1 | GluRS          | Glutamyl-tRNA synthetase                          | Red     | Green | Red      | Green |
| YP_003171865.1 | AcpP           | Acy carrier protein                               | Red     | Green | Red      | Green |
| YP_003170642.1 | RaiA           | Ribosome-associated translation inhibitor         | Red     | Green | Red      | Green |
| YP_003171357.1 | RbfA           | 30S ribosome-binding factor                       | Red     | Green | Red      | Green |
| YP_003171370.1 | Frr            | Ribosome recycling factor                         | Red     | Green | Red      | Green |
| YP_003171135.1 | RpsA           | 30S ribosomal protein S1                          | Red     | Green | Red      | Green |
| YP_003171374.1 | RpsB           | 30S ribosomal protein S2                          | Red     | Green | Red      | Green |
| YP_003172227.1 | RpsC           | 30S ribosomal protein S3                          | Red     | Green | Red      | Green |
| YP_003171001.1 | RpsD           | 30S ribosomal protein S4                          | Red     | Green | Red      | Green |
| YP_003172216.1 | RpsE           | 30S ribosomal protein S5                          | Red     | Green | Red      | Green |
| YP_003169757.1 | RpsF           | 30S ribosomal protein S6                          | Red     | Green | Red      | Green |
| YP_003172240.1 | RpsG           | 30S ribosomal protein S7                          | Red     | Green | Red      | Green |
| YP_003172219.1 | RpsH           | 30S ribosomal protein S8                          | Red     | Green | Red      | Green |
| YP_003172234.1 | RpsJ           | 30S ribosomal protein S10                         | Red     | Green | Red      | Green |
| YP_003172208.1 | RpsK           | 30S ribosomal protein S11                         | Red     | Green | Red      | Green |
| YP_003172241.1 | RpsL           | 30S ribosomal protein S12                         | Red     | Green | Red      | Green |
| YP_003172209.1 | RpsM           | 30S ribosomal protein S13                         | Red     | Green | Red      | Green |
| YP_003171389.1 | RpsP           | 30S ribosomal protein S16                         | Red     | Green | Red      | Green |
| YP_003169759.1 | RpsR           | 30S ribosomal protein S18                         | Red     | Green | Red      | Green |
| YP_003172229.1 | RpsS           | 30S ribosomal protein S19                         | Red     | Green | Red      | Green |
| YP_003172034.1 | RplA           | 50S ribosomal protein L1                          | Red     | Green | Red      | Green |
| YP_003172230.1 | RplB           | 50S ribosomal protein L2                          | Red     | Green | Red      | Green |
| YP_003172233.1 | RplC           | 50S ribosomal protein L3                          | Red     | Green | Red      | Green |
| YP_003172232.1 | RplD           | 50S ribosomal protein L4                          | Red     | Green | Red      | Green |
| YP_003172221.1 | RplE           | 50S ribosomal protein L5                          | Red     | Green | Red      | Green |
| YP_003172218.1 | RplF           | 50S ribosomal protein L6                          | Red     | Green | Red      | Green |
| YP_003172023.1 | RplJ           | 50S ribosomal protein L10                         | Red     | Green | Red      | Green |
| YP_003172035.1 | RplK           | 50S ribosomal protein L11                         | Red     | Green | Red      | Green |
| YP_003172194.1 | RplM           | 50S ribosomal protein L13                         | Red     | Green | Red      | Green |
| YP_003172223.1 | RplN           | 50S ribosomal protein L14                         | Red     | Green | Red      | Green |
| YP_003172214.1 | RplO           | 50S ribosomal protein L15                         | Red     | Green | Red      | Green |
| YP_003172226.1 | RplP           | 50S ribosomal protein L16                         | Red     | Green | Red      | Green |
| YP_003172206.1 | RplQ           | 50S ribosomal protein L17                         | Red     | Green | Red      | Green |
| YP_003172217.1 | RplR           | 50S ribosomal protein L18                         | Red     | Green | Red      | Green |
| YP_003171385.1 | RplS           | 50S ribosomal protein L19                         | Red     | Green | Red      | Green |
| YP_003171491.1 | RplT           | 50S ribosomal protein L20                         | Red     | Green | Red      | Green |
| YP_003171436.1 | RplU           | 50S ribosomal protein L21                         | Red     | Green | Red      | Green |
| YP_003172228.1 | RplV           | 50S ribosomal protein L22                         | Red     | Green | Red      | Green |
| YP_003172231.1 | RplW           | 50S ribosomal protein L23                         | Red     | Green | Red      | Green |
| YP_003171434.1 | RpmA           | 50S ribosomal protein L27                         | Red     | Green | Red      | Green |
| YP_003172022.1 | RplL           | 50S ribosomal protein L7/L12                      | Red     | Green | Red      | Green |
| YP_003172222.1 | RplX           | 50S ribosomal protein L24                         | Red     | Green | Red      | Green |
| YP_003172225.1 | RpmC           | 50S ribosomal protein L29                         | Red     | Green | Red      | Green |
| YP_003172290.1 | RpmE2          | 50S ribosomal protein L31                         | Red     | Green | Red      | Green |
| YP_003171114.1 | RpmF           | 50S ribosomal protein L32                         | Red     | Green | Red      | Green |
| YP_003171650.1 | RpmG           | 50S ribosomal protein L33                         | Red     | Green | Red      | Green |
| YP_003172198.1 | YP_003172198.1 | Hypothetical protein LGG_02452                    | Red     | Green | Red      | Green |
| YP_003170320.1 | YP_003170320.1 | Hypothetical protein LGG_00574                    | Red     | Green | Red      | Green |
| YP_003170419.1 | YP_003170419.1 | Hypothetical protein LGG_00673                    | Red     | Green | Red      | Green |
| YP_003172634.1 | YP_003172634.1 | Hypothetical protein LGG_02888                    | Red     | Green | Red      | Green |
| YP_003171439.1 | YP_003171439.1 | Hypothetical protein LGG_01693                    | Red     | Green | Red      | Green |
| YP_003171345.1 | YP_003171345.1 | Hypothetical protein LGG_01599                    | Red     | Green | Red      | Green |
| YP_003171528.1 | YP_003171528.1 | Com Y1bF Superfamily                              | Red     | Green | Red      | Green |
| YP_003172378.1 | YP_003172378.1 | Hypothetical protein LGG_02632                    | Red     | Green | Red      | Green |
| YP_003170467.1 | YP_003170467.1 | Hypothetical protein LGG_00721                    | Red     | Green | Red      | Green |
| YP_003170515.1 | YP_003170515.1 | IreB family regulatory phosphoprotein             | Red     | Green | Red      | Green |
| YP_003170536.1 | YP_003170536.1 | Hypothetical protein LGG_00790                    | Red     | Green | Red      | Green |
| YP_003170859.1 | YP_003170859.1 | Hypothetical protein LGG_01113                    | Red     | Green | Red      | Green |
| YP_003171101.1 | YP_003171101.1 | Hypothetical protein LGG_01355                    | Red     | Green | Red      | Green |
| YP_003171217.1 | YP_003171217.1 | Hypothetical protein LGG_01471                    | Red     | Green | Red      | Green |
| YP_003172119.1 | YP_003172119.1 | Hypothetical protein LGG_02373                    | Red     | Green | Red      | Green |

1        **Figure 4.** A heat map comparing the most distinctive protein abundance changes  
2        (estimated by the emPAI values) among the predicted moonlighters. Red and green refer  
3        to higher and lower protein abundances, respectively.

4  
5  
6  
7  
8  
9  
10  
11  
12  
13  
14  
15  
16  
17  
18  
19  
20  
21  
22  
23  
24  
25  
26  
27  
28  
29  
30  
31  
32  
33  
34  
35

Fig. 5

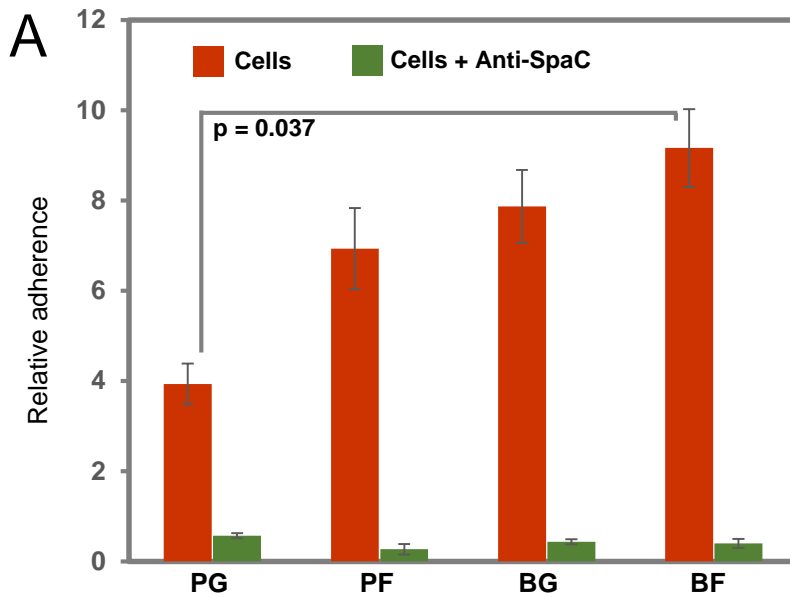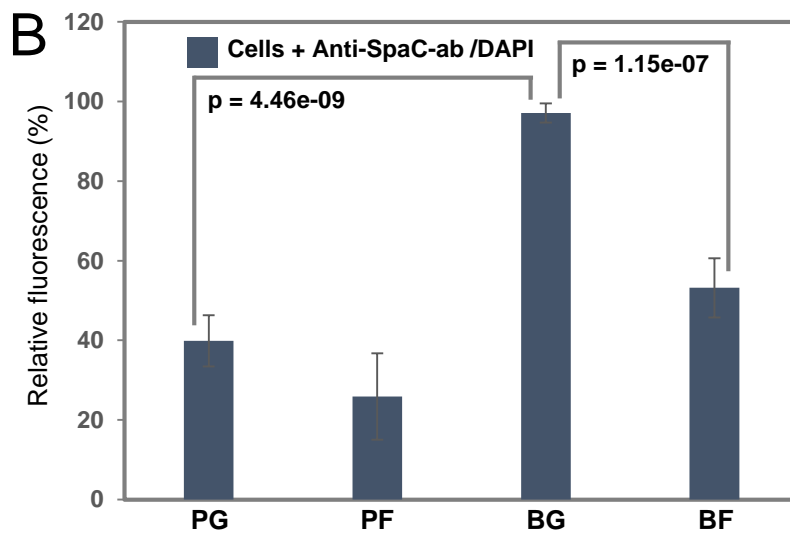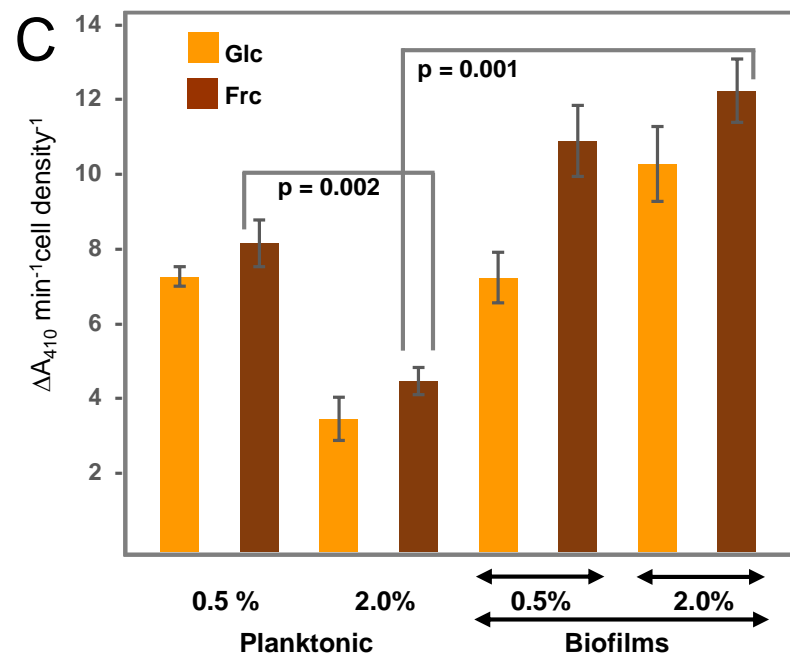

1        **Figure 5.** Representative diagrams **(A)** showing the relative adherences (average adhesion  
2        percentage of the added bacteria) of planktonic (PC) and biofilm GG (BC) cells grown on  
3        *frc* and *glc* to porcine mucus and **(B)** illustrating the abundance of the SpaC pilin subunit  
4        on the cells treated first with anti-SpaC-antibody and then Alexa-488-conjugated goat anti-  
5        rabbit IgG and/or the DAPI counterstain. **(C)** The surface-associated aminopeptidase  
6        activity (PepC and PepN) of the planktonic and biofilm cells was assessed using 1 mM  
7        Leu-pNA. Significant differences are indicated with lines. The error bars indicate SD for  
8        two or more biological replicates, each with several technical repeats.  
9
